# Supplementary material for: Reliable space Boost converter enabled with an energy conservation-based mathematical framework
Source: Research Square preprint supplement (doi:10.21203/rs.3.rs-8201863/v1), 2026-01-06
Supplement: Supplementary file 1 [file b3940a9ce21e239adcab3891.docx]

**Supplementary Information**

**Reliable space Boost converter enabled with an energy conservation-based mathematical framework**

Yifan Wang1, Wenhua Li1, Zhenlong Wang1, Xinrui Zhang1, Jianfeng Sun1, Qianfu Xia1, Zhongtao Gou1, Jiangang Rong2, Tao Ye1*

1Ministry of Education Key Laboratory of Micro/Nano Systems for Aerospace, Key Laboratory of Micro- and Nano-Electro-Mechanical Systems of Shaanxi Province, School of Mechanical Engineering, Northwestern Polytechnical University; Xi’an, 710000, China.

2Shanghai Guoyu Zhilian Aerospace Technology Co., Ltd; Shanghai, 201112, China.

*Corresponding author. Email: [yetao@nwpu.edu.cn](mailto:yetao@nwpu.edu.cn)

**Materials and Methods**

**Energy conservation-based mathematical framework (ECMF)**

**A. Energy-landscape perturbation–response mechanism in Boost transients**

When an external perturbation disrupts the steady-state energy balance of a boost converter, the output voltage responds with a rapid excursion. During the interval from the onset of the disturbance to the attainment of the peak voltage, the circuit obeys the energy-conservation relation:

(1)

(2)

The left side of equation (1) represents the magnetic energy released by the inductor, whereas the first term on the right side corresponds to the electrostatic energy absorbed by the output capacitor, the second term quantifies the energy dissipated in the load, and the remaining terms account for losses associated with parasitic parameters.

As the input voltage () and the duty cycle () increase, equation (3) becomes larger, causing the peak voltage () to rise.

(3)

As the load resistance () increases, decreases, causing to rise. When the inductance () is small, the rapid current decay during the off-phase results in incomplete energy transfer to the capacitor, with a substantial portion of the stored magnetic energy dissipated as heat. Increasing moderates the discharge rate, enhances energy delivery to the capacitor, and thus raises . However, as becomes large, further increases of will reduce the quantity defined by equation (4), thereby leading to a decline in .

(4)

Similarly, when the capacitance () is small, the limited charge-storage capacity of the capacitor leads to incomplete absorption of the delivered energy, with significant losses manifesting as heat. As increases, energy absorption becomes more efficient, resulting in a higher . However, once exceeds a critical threshold, further increases of will reduce as governed by the term in equation (2). Moreover, as , , , and increase, the corresponding loss terms in equation (2) grow accordingly, thereby diminishing the net energy delivered to the output stage and resulting in a reduction of .

**B. Equation based on the law of energy conservation**

During the transition from disturbance to the reestablishment of steady state, the energy conservation equation can be written as:

(5)

Differentiation of equation (5) with respect to time yields the instantaneous power balance:

(6)

According to Kirchhoff’s Voltage Law (KVL), the voltage relationship can be expressed as:

(7)

By substituting equation (7) into equation (6), we obtain:

(8)

By neglecting the second-order term , the solution is obtained as:

(9)

(10)

By substituting equations (9) and (10) into equation (7) and simplifying, the second-order differential equation is obtained as:

(11)

Due to the non-transient, sustained loss associated with , which primarily affects the steady-state behavior of the output voltage, and considering that both and contribute as resistive elements at the output port, the following correction is introduced to account for the neglected loss:

(12)

The complete second-order differential equation is expressed as:

(13)

By comparing with the standard form of equation (14), the time-domain expression for the output voltage is obtained as shown in equation (15):

(14)

(15)

(16)

(17)

Under zero conditions, the last term of equation (15) vanishes. In equation (17), and represent the load resistances before and after the change, respectively.

**ECMF-based transfer function model (ECMF-TFM)**

Based on equations (13) and (14) derived from the ECMF, the following fundamental equations can be obtained:

(18)

(19)

**A. Equation for varied input voltages**

To analyze the dynamic behavior of the output voltage at system startup, it is essential to derive the transfer function of with respect to . In this process, the average value of each parameter over a single switching period is considered (**Fig. S1a**). When is stable, the following relationships hold:

(20)

(21)

(22)

(23)

(24)

When changes:

(25)

(26)

(27)

(28)

(29)

For , in switch-on time and switch-off time :

(30)

(31)

Combining equations (30) and (31), we obtain:

(32)

Similarly, for , in time and :

(33)

(34)

Combining equations (33) and (34), we derive:

(35)

When is stable:

(36)

(37)

When changes:

(38)

(39)

By subtracting equations (38) from (36) and (39) from (37), we obtain:

(40)

(41)

Based on the voltage-current relationship, we derive the following:

(42)

(43)

Substituting equations (40) and (41) into equations (42) and (43) yields:

(44)

When the input voltage is modeled as a step signal, the steady-state voltage is given by:

(45)

This is corrected in combination with equation (18):

(46)

Therefore, the final transfer function is:

(47)

To simplify the calculation, , , , , and are used instead of the coefficients in (47). For step signal , the output signal is:

(48)

where and are satisfied, and , , , , and are all greater than zero. Transforming the output signal, we obtain the time-domain analytical equation for the output voltage:

(49)

Through extensive calculations, it is determined that and form a pair of conjugate complex roots, while and form another pair of conjugate complex roots. The following parameters are introduced:

(50)

(51)

(52)

(53)

Substituting these into equation (49) yields:

(54)

where . By allowing time in equation (54) to approach infinity and setting its first derivative to zero, the steady-state and dynamic characteristics of the output voltage can be determined as follows:

(55)

(56)

(57)

**B. Equation for varied load resistances**

When the load resistance changes, the output voltage consists of two components: the steady-state value of the previous moment and the amount of change (**Fig. S1b**). When is stable:

(58)

When changes:

(59)

By combining equations (58) and (59) with equations (20)-(23) and (25)-(28), we obtain:

(60)

(61)

To simplify the calculation, , , and are considered as the overall impedance . Based on the voltage-current relationship, we obtain:

(62)

(63)

where can be calculated from the evolution of the result in equation (19):

(64)

Furthermore:

(65)

(66)

By combining equations (60), (61), (62), and (63), we derive:

(67)

By combining equations (65) and (66), we derive:

(68)

Therefore, the transfer function is:

(69)

The coefficients are as follows:

(70)

Due to computational errors in the derivation process, certain coefficients of the transfer function are adjusted based on empirical correction equations. The revised results are as follows:

(71)

Further:

(72)

The final analytical equation for the output voltage is:

(73)

where , , , , , , , and are the parameters derived from the time-domain conversion of equation (72).

**The formula from Reference 14**

For , in time and :

(74)

(75)

Combining equations (74) and (75), we obtain:

(76)

Similarly, for , in time and :

(77)

(78)

Combining equations (77) and (78), we derive:

(79)

When is stable:

(80)

(81)

When changes:

(82)

(83)

By subtracting equations (82) from (80) and (83) from (81), we obtain:

(84)

(85)

Based on the voltage-current relationship, we derive the following:

(86)

(87)

Substituting equations (84) and (85) into equations (86) and (87) yields:

(88)

(89)

**Simulations and physical experiments**

All simulations were conducted using LTspice, where the Boost converter was modeled using time-domain differential equations incorporating parasitic resistances and nonlinear behaviors. The simulation framework enabled the evaluation of system responses under a range of input voltage and load step scenarios. Core components, such as inductors, capacitors, and MOSFETs, were modeled with realistic ESR and switching characteristics, and a fixed-step solver was used to ensure numerical stability in fast transient simulations.

For experimental validation, a prototype Boost converter circuit was fabricated on a custom-designed, two-layer PCB using standard off-the-shelf components. Careful layout optimizations (shortened current loops, optimized ground return paths, and separated high- and low-power traces) were employed to minimize parasitic wire inductance, resistive losses, and electromagnetic interference. Thermal considerations were addressed through short trace lengths and widened copper planes to improve heat dissipation and reduce resistance drift.

A programmable DC power supply was used to provide a stable input voltage source, allowing for controlled step changes during testing. The power MOSFET was driven by a PWM control signal generated from a calibrated PWM module operating at 10 kHz. Output voltage dynamics were captured using a high-precision digital oscilloscope (SDS2204X, Siglent Technologies), featuring a 2 GSa/s sampling rate and 12-bit vertical resolution.

The steady-state error and the dynamic-state error in this study were calculated as follows:

where represents the value of the sampling point of the actual waveform, and represents the value of the sampling point of the fitted waveform.

The equation used to calculate the RMSE is:

where represents the value of the i-th sampling point of the actual waveform, and represents the value of the i-th sampling point of the fitted waveform, and is the total number of sampling points. A lower RMSE value indicates better fitting accuracy.

**Figures**

**
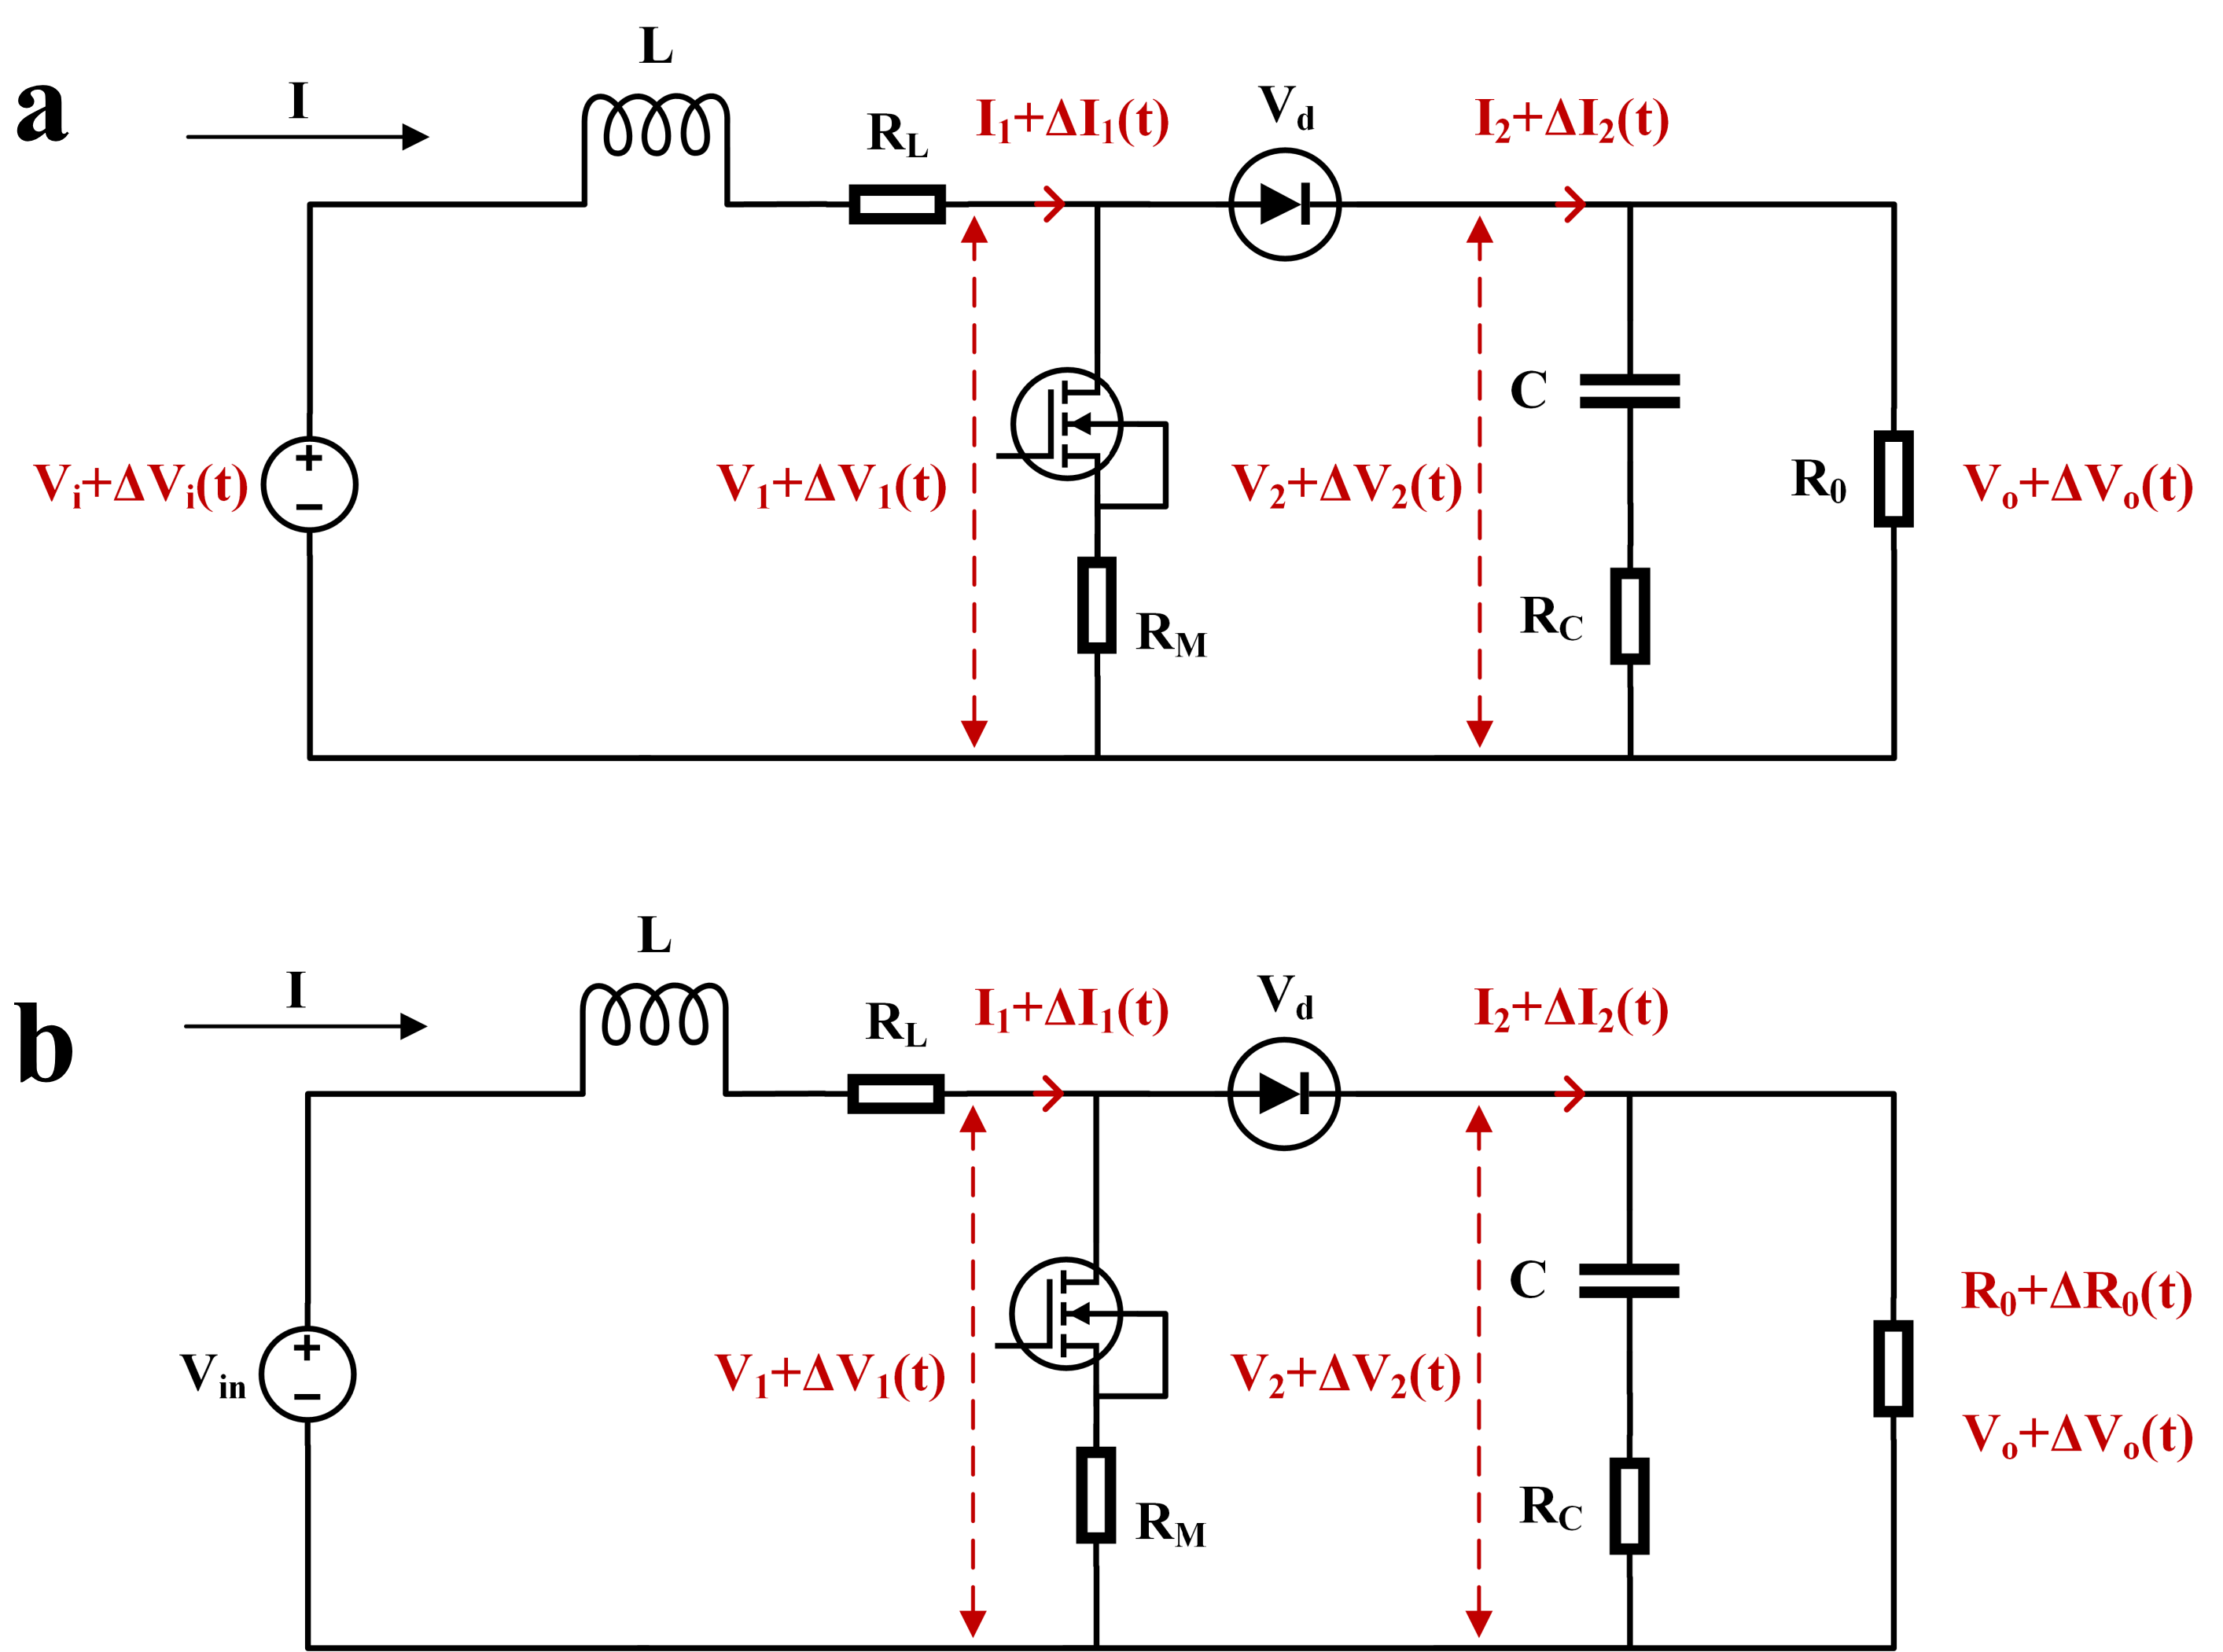
**

**Fig. S1. Schematic diagrams of the Boost converter.** By establishing the relationship between the voltages and currents at different nodes before and after the disturbance, the transfer functions of the output voltage with respect to the input voltage (**a**) and load resistance (**b**) can be obtained.


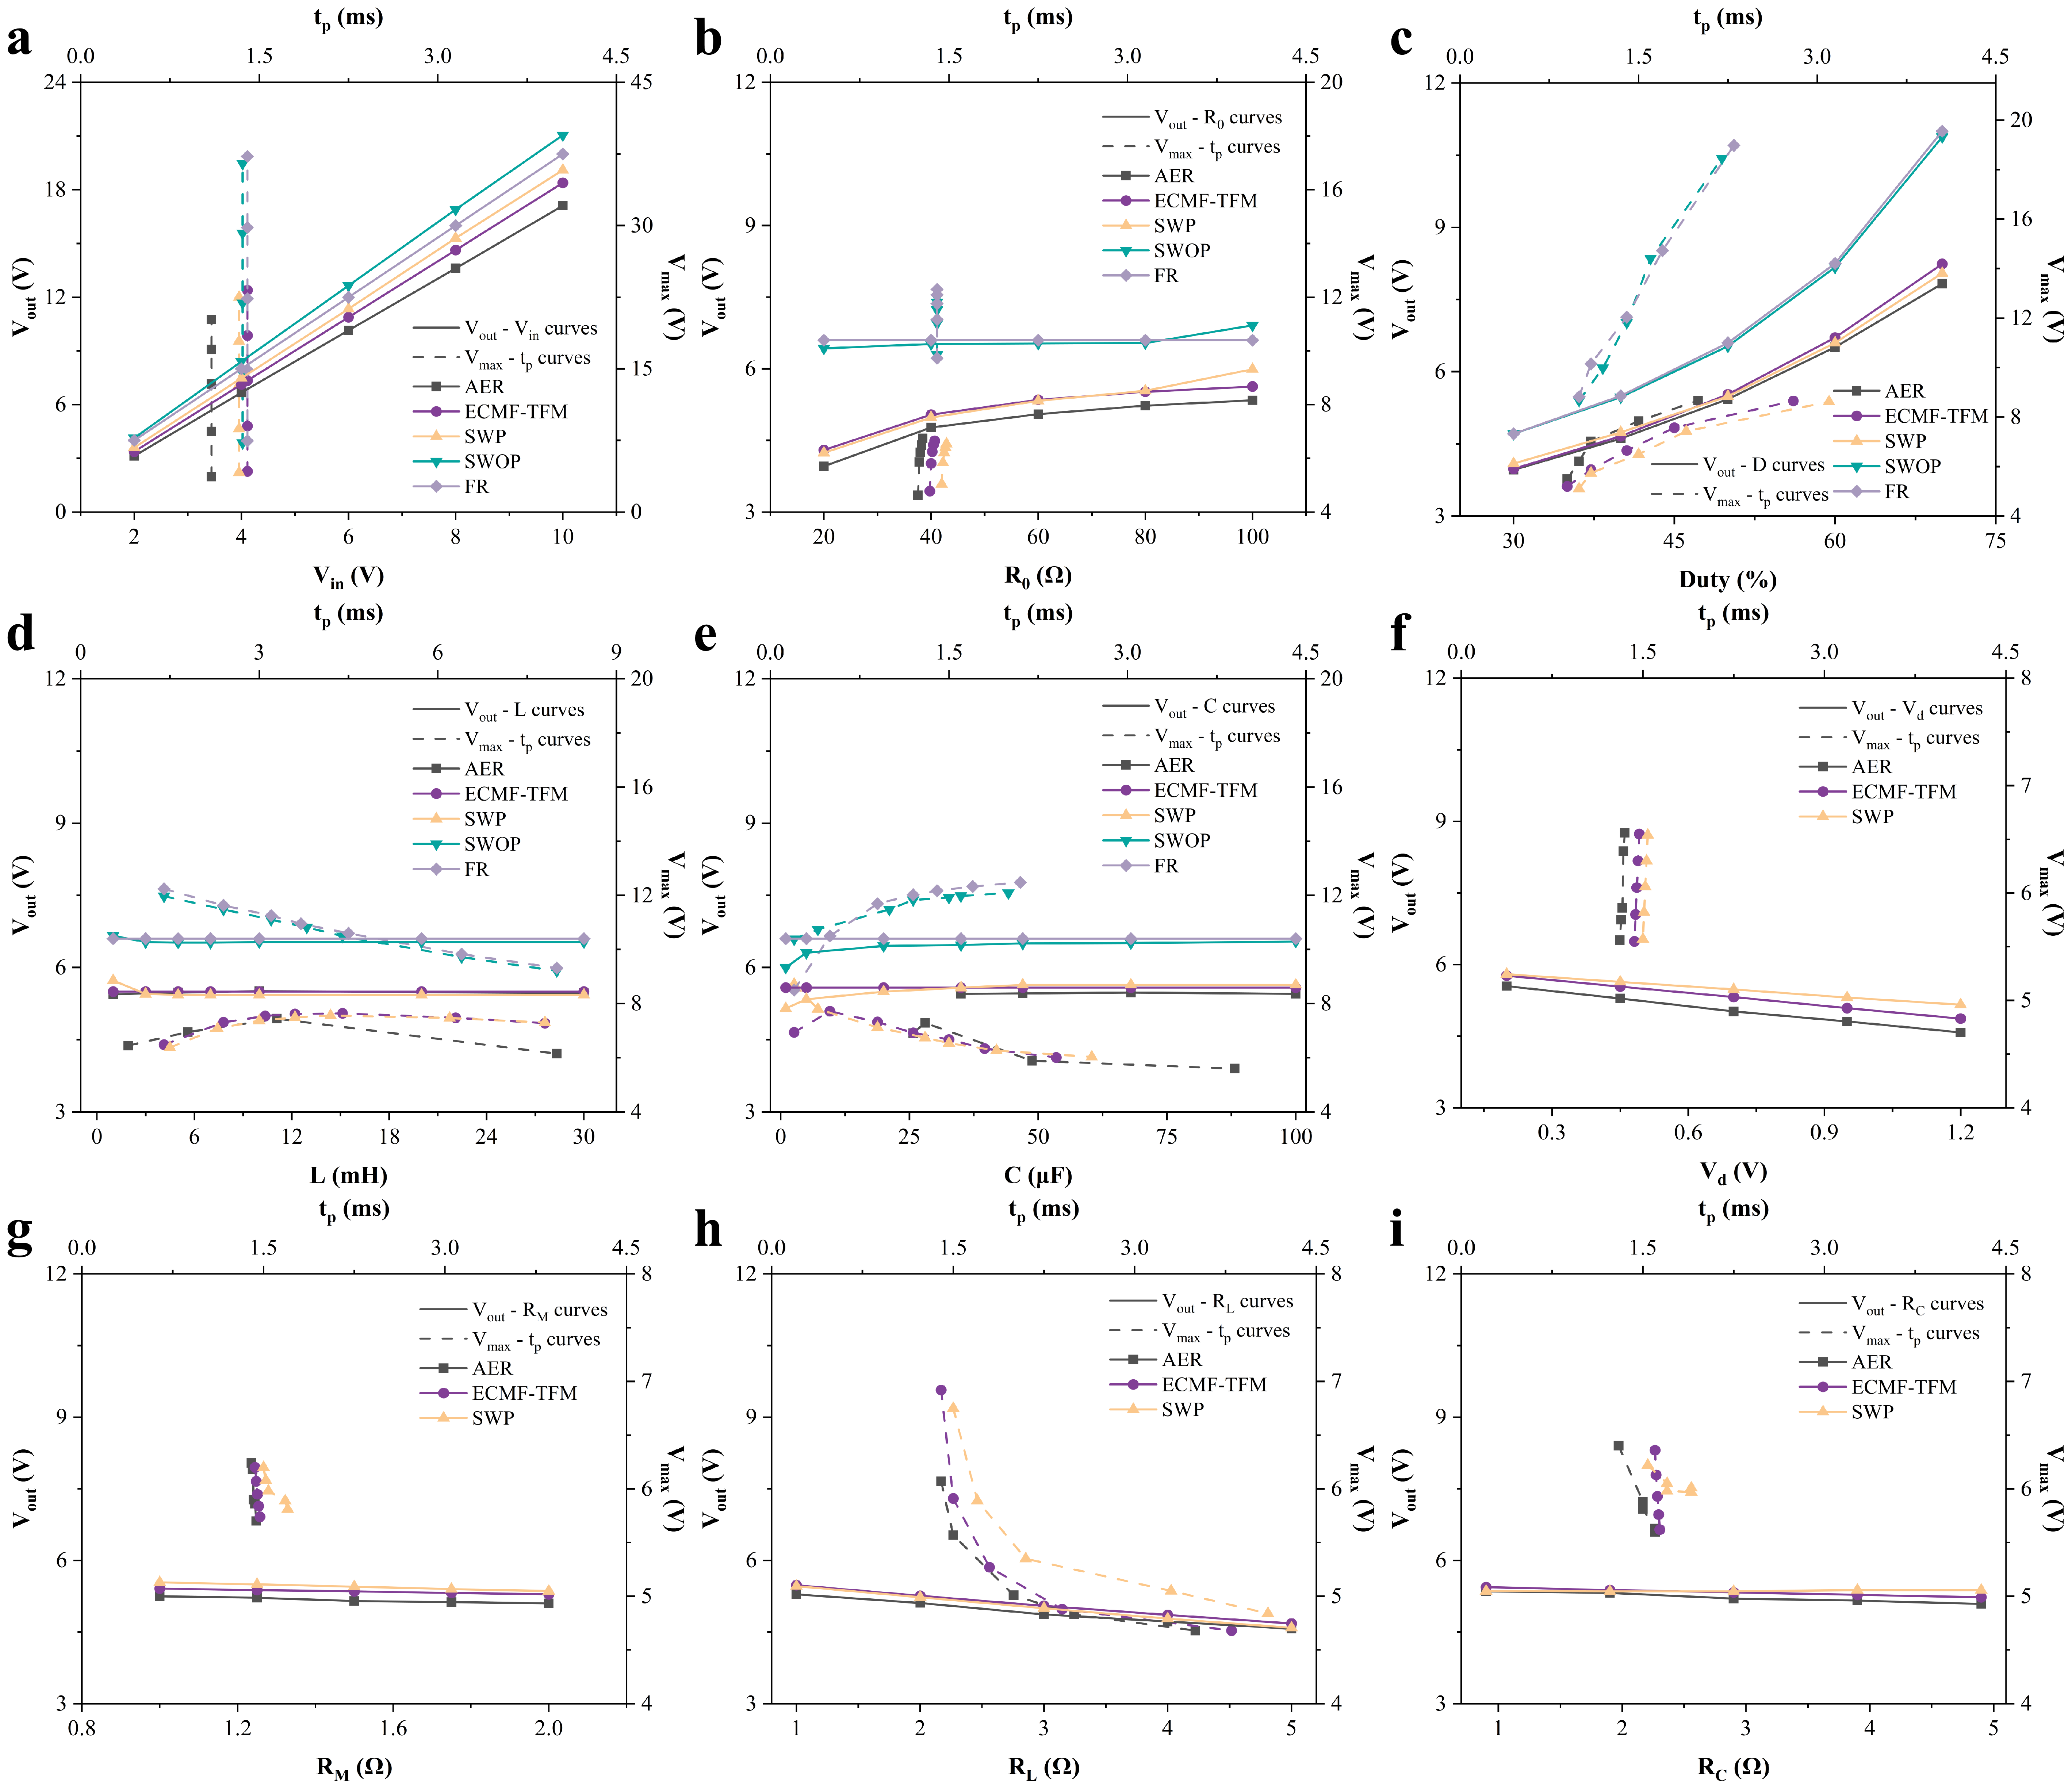


**Fig. S2. Influence of each component parameter on output voltages.** **a**, The solid line represents the - curve, and the dashed line represents the - curve. As the input voltage increases, both and increase, while remains nearly constant. **b**, As the load resistance increases, , , and all increase. **c**, As the duty cycle increases, , , and all increase. **d**, As the inductance increases, remains nearly constant, increases, and initially increases before decreasing. **e**, As the capacitance increases, remains nearly constant, increases, and initially increases before decreasing. **f**, As the diode forward voltage increases, , , and all decrease. **g**, As the on-resistance of the MOSFET increases, both and decrease, while increases. **h**, As the parasitic resistance of the inductor increases, both and decrease, while increases. **i**, As the parasitic resistance of the capacitor increases, both and decrease, while increases.


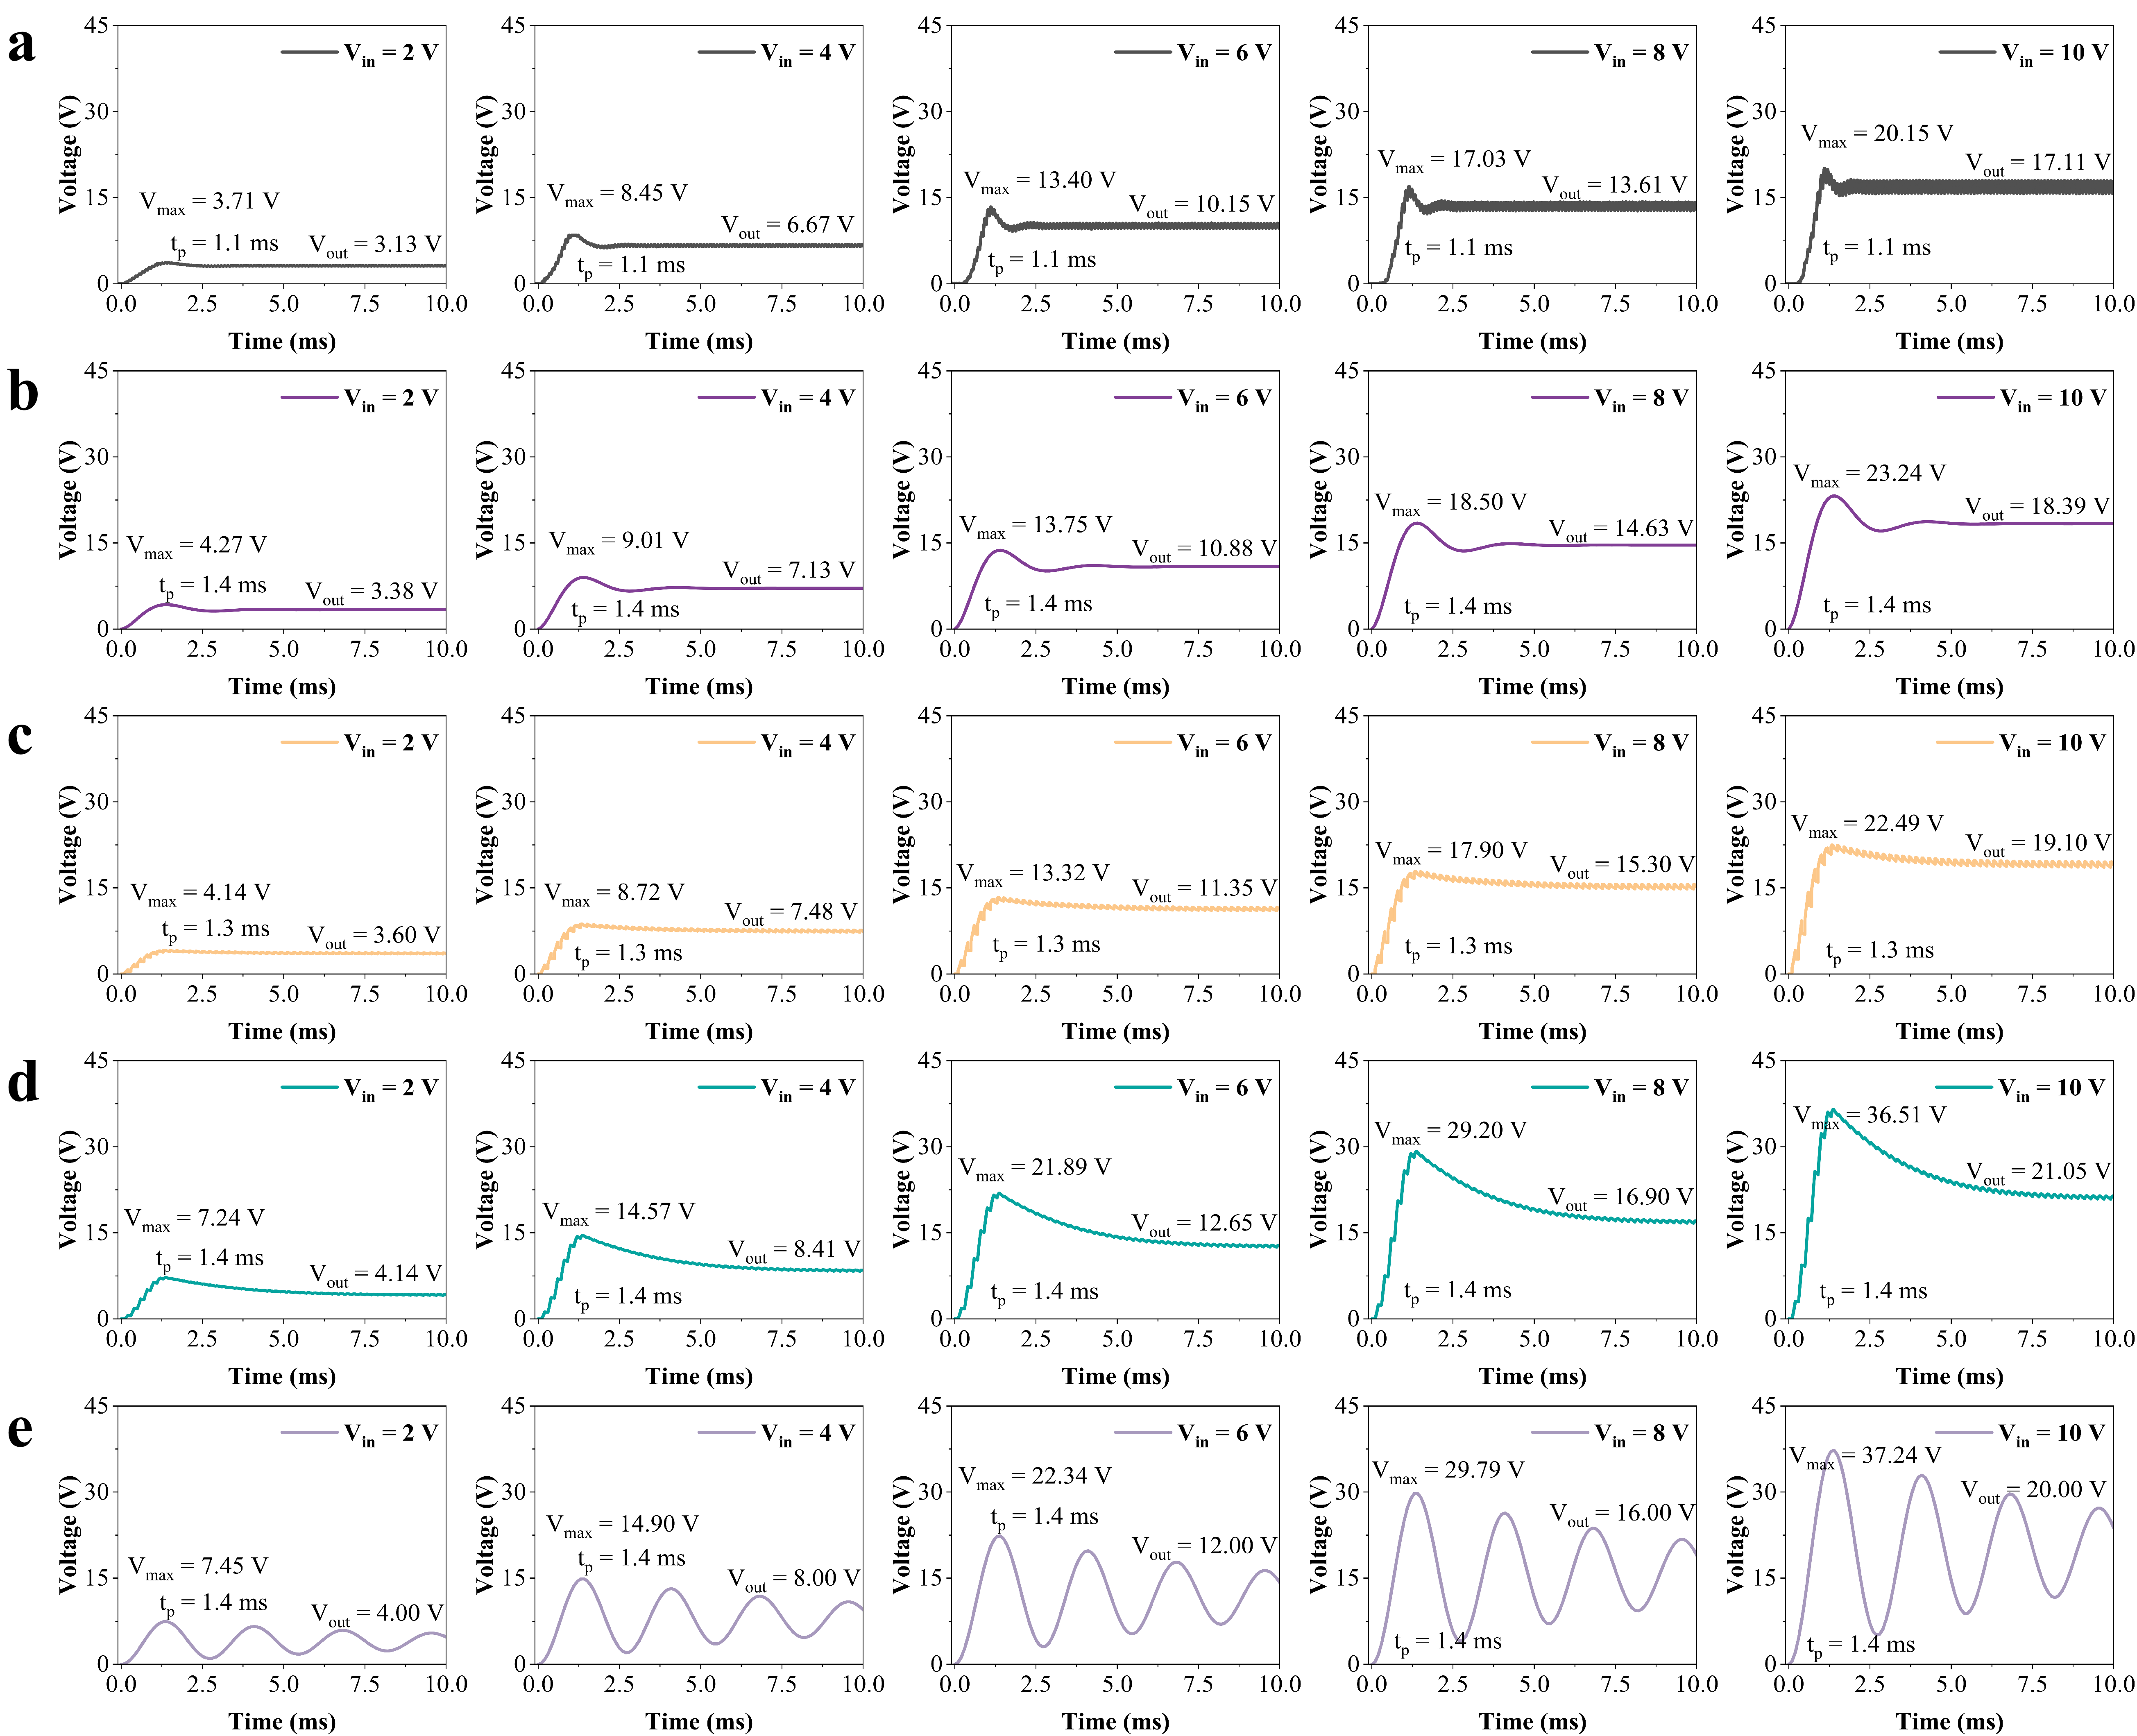


**Fig. S3. Influence of on output voltage.** **a**, AER. **b**, ECMF-TFM. The fitting results are in good agreement with the experimental data. **c**, SWP. While the steady-state performance is satisfactory, there is a partial loss in dynamic performance. **d**, SWOP. Both the steady-state and dynamic performances exhibit significant deviations from the experimental results. **e**, FR. The oscillation time is excessively long, resulting in a substantial discrepancy with the experimental results.


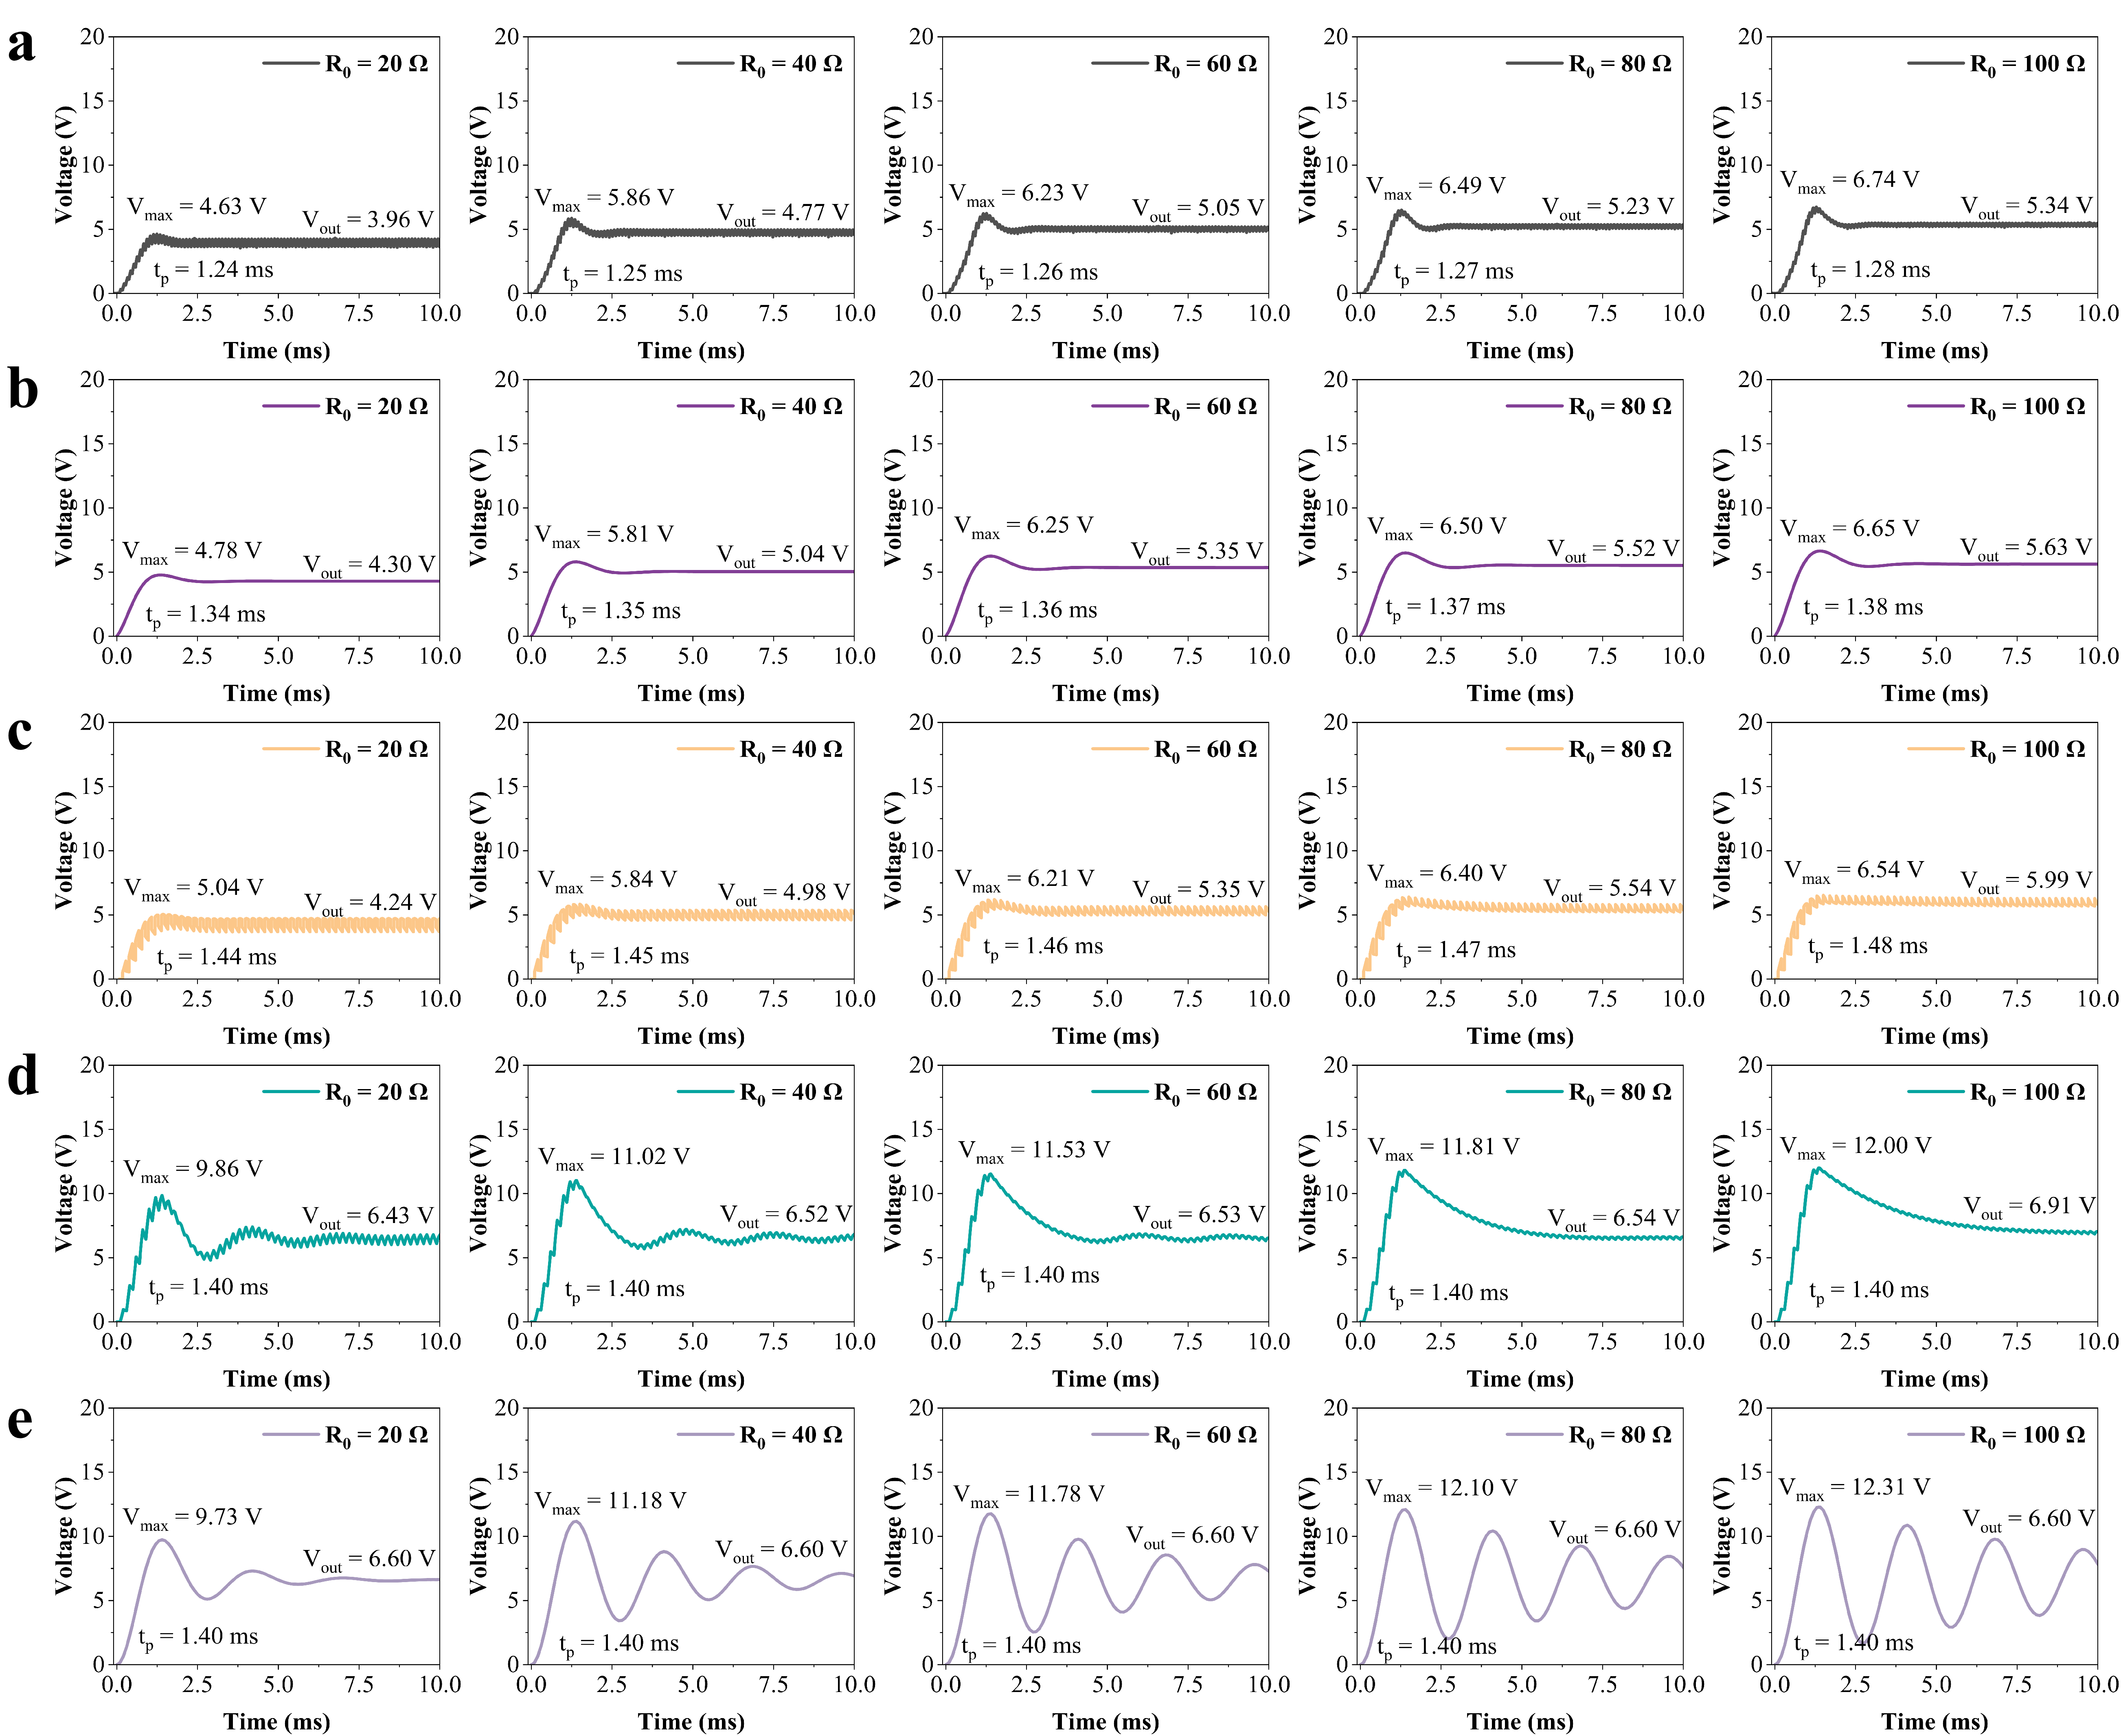


**Fig. S4. Influence of on output voltage.** **a**, AER. **b**, ECMF-TFM. The fitting results are in good agreement with the experimental data. **c**, SWP. While the steady-state performance is satisfactory, there is a partial loss in dynamic performance. **d**, SWOP. Both the steady-state and dynamic performances exhibit significant deviations from the experimental results. **e**, FR. The oscillation time is excessively long, resulting in a substantial discrepancy with the experimental results.


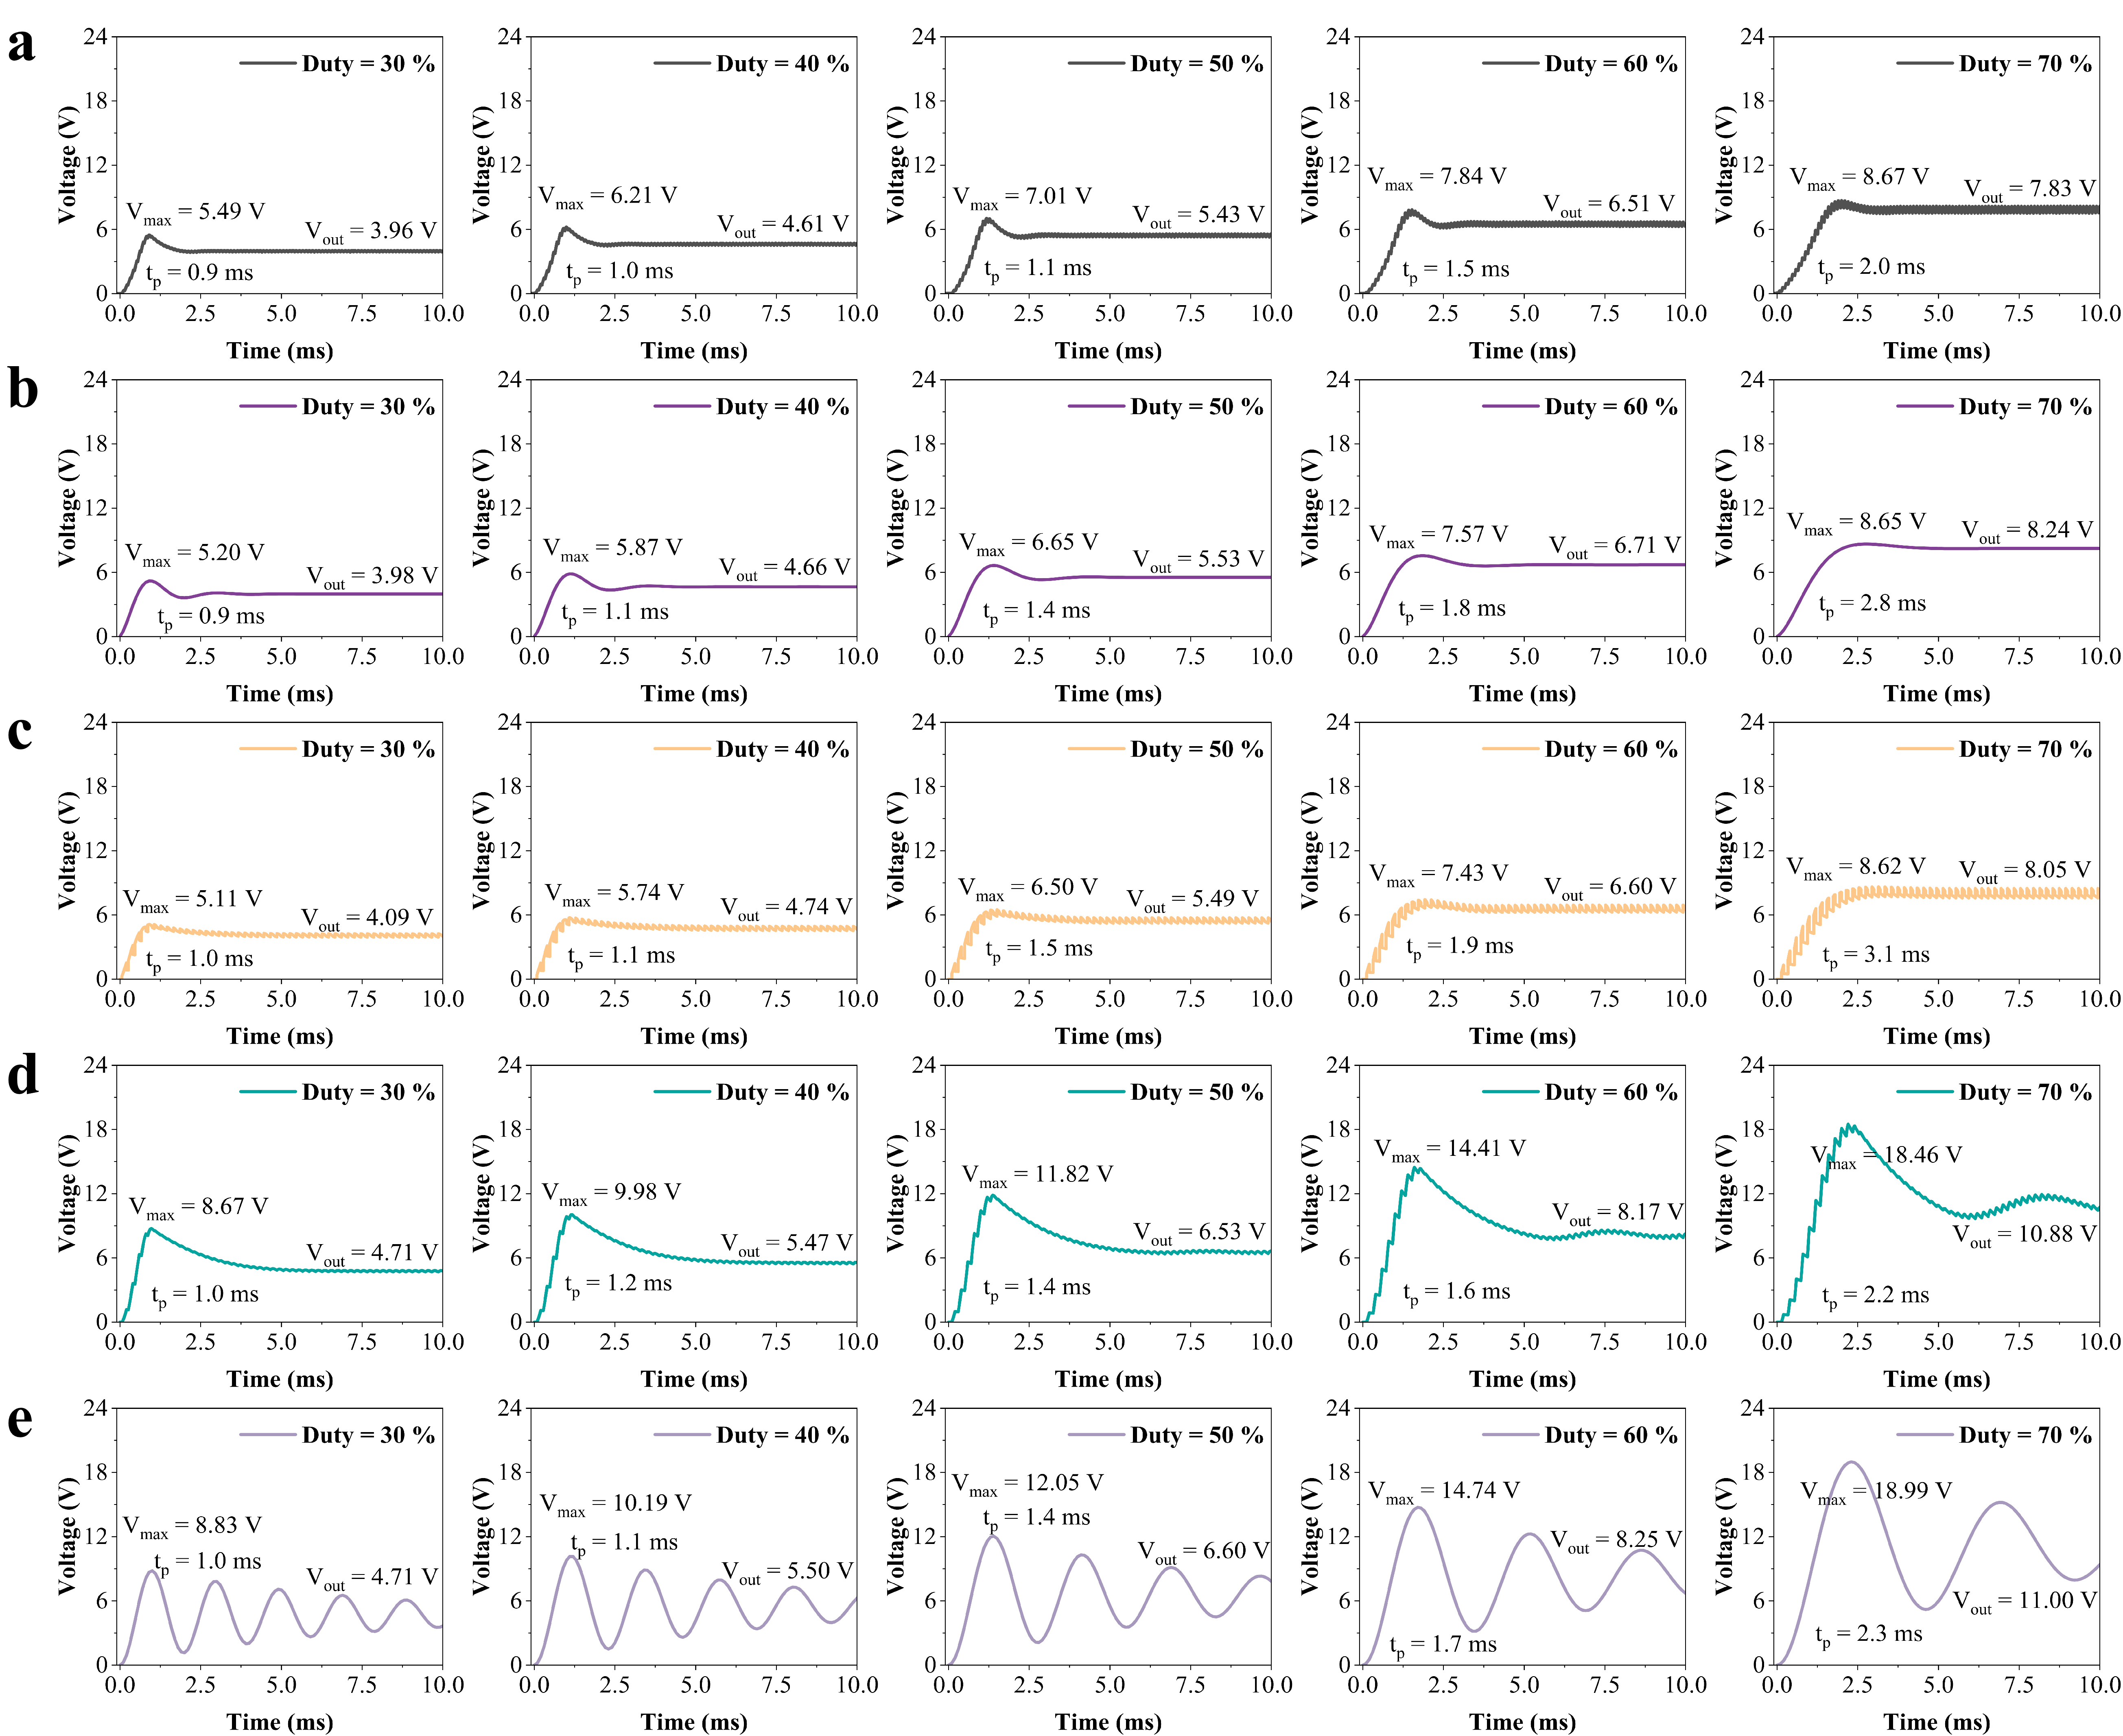


**Fig. S5. Influence of on output voltage.** **a**, AER. **b**, ECMF-TFM. The fitting results are in good agreement with the experimental data. **c**, SWP. While the steady-state performance is satisfactory, there is a partial loss in dynamic performance. **d**, SWOP. Both the steady-state and dynamic performances exhibit significant deviations from the experimental results. **e**, FR. The oscillation time is excessively long, resulting in a substantial discrepancy with the experimental results.


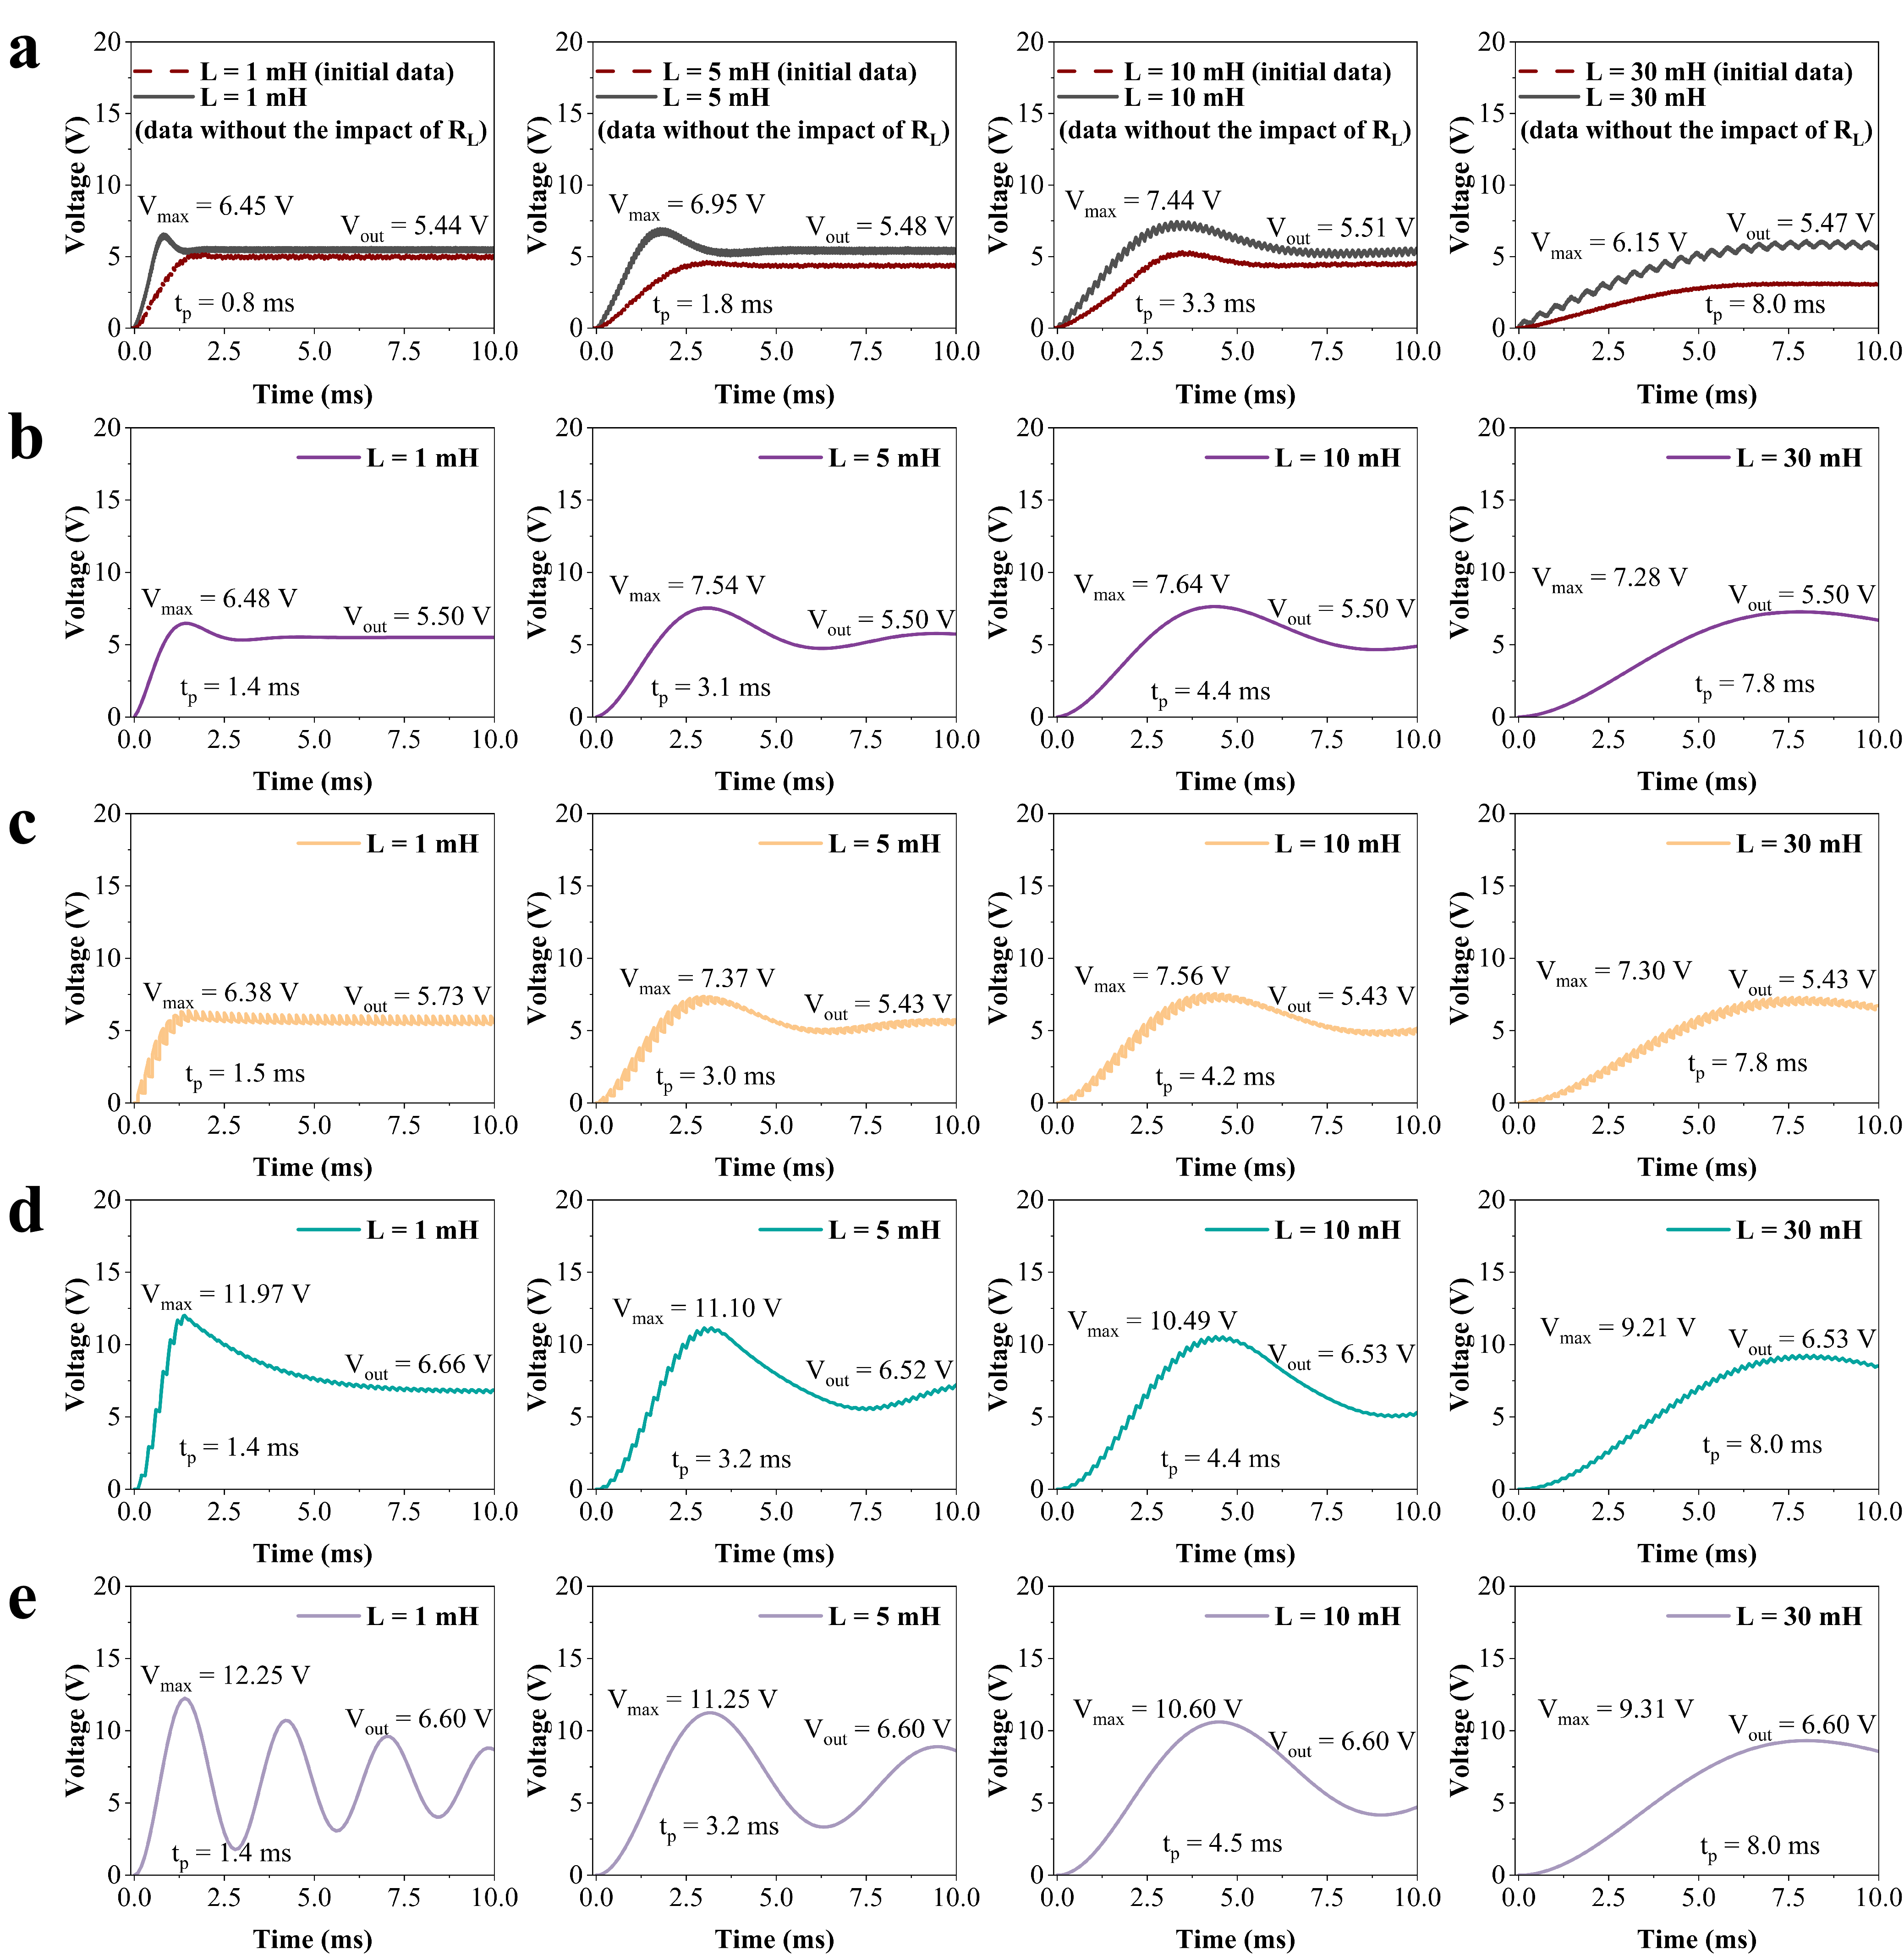


**Fig. S6. Influence of on output voltage.** **a**, AER (The red line represents the initial data, while the black line represents the data after eliminating the influence of according to the trend shown in Fig. S10). **b**, ECMF-TFM. The fitting results are in good agreement with the experimental data. **c**, SWP. While the steady-state performance is satisfactory, there is a partial loss in dynamic performance. **d**, SWOP. Both the steady-state and dynamic performances exhibit significant deviations from the experimental results. **e**, FR. The oscillation time is excessively long, resulting in a substantial discrepancy with the experimental results.


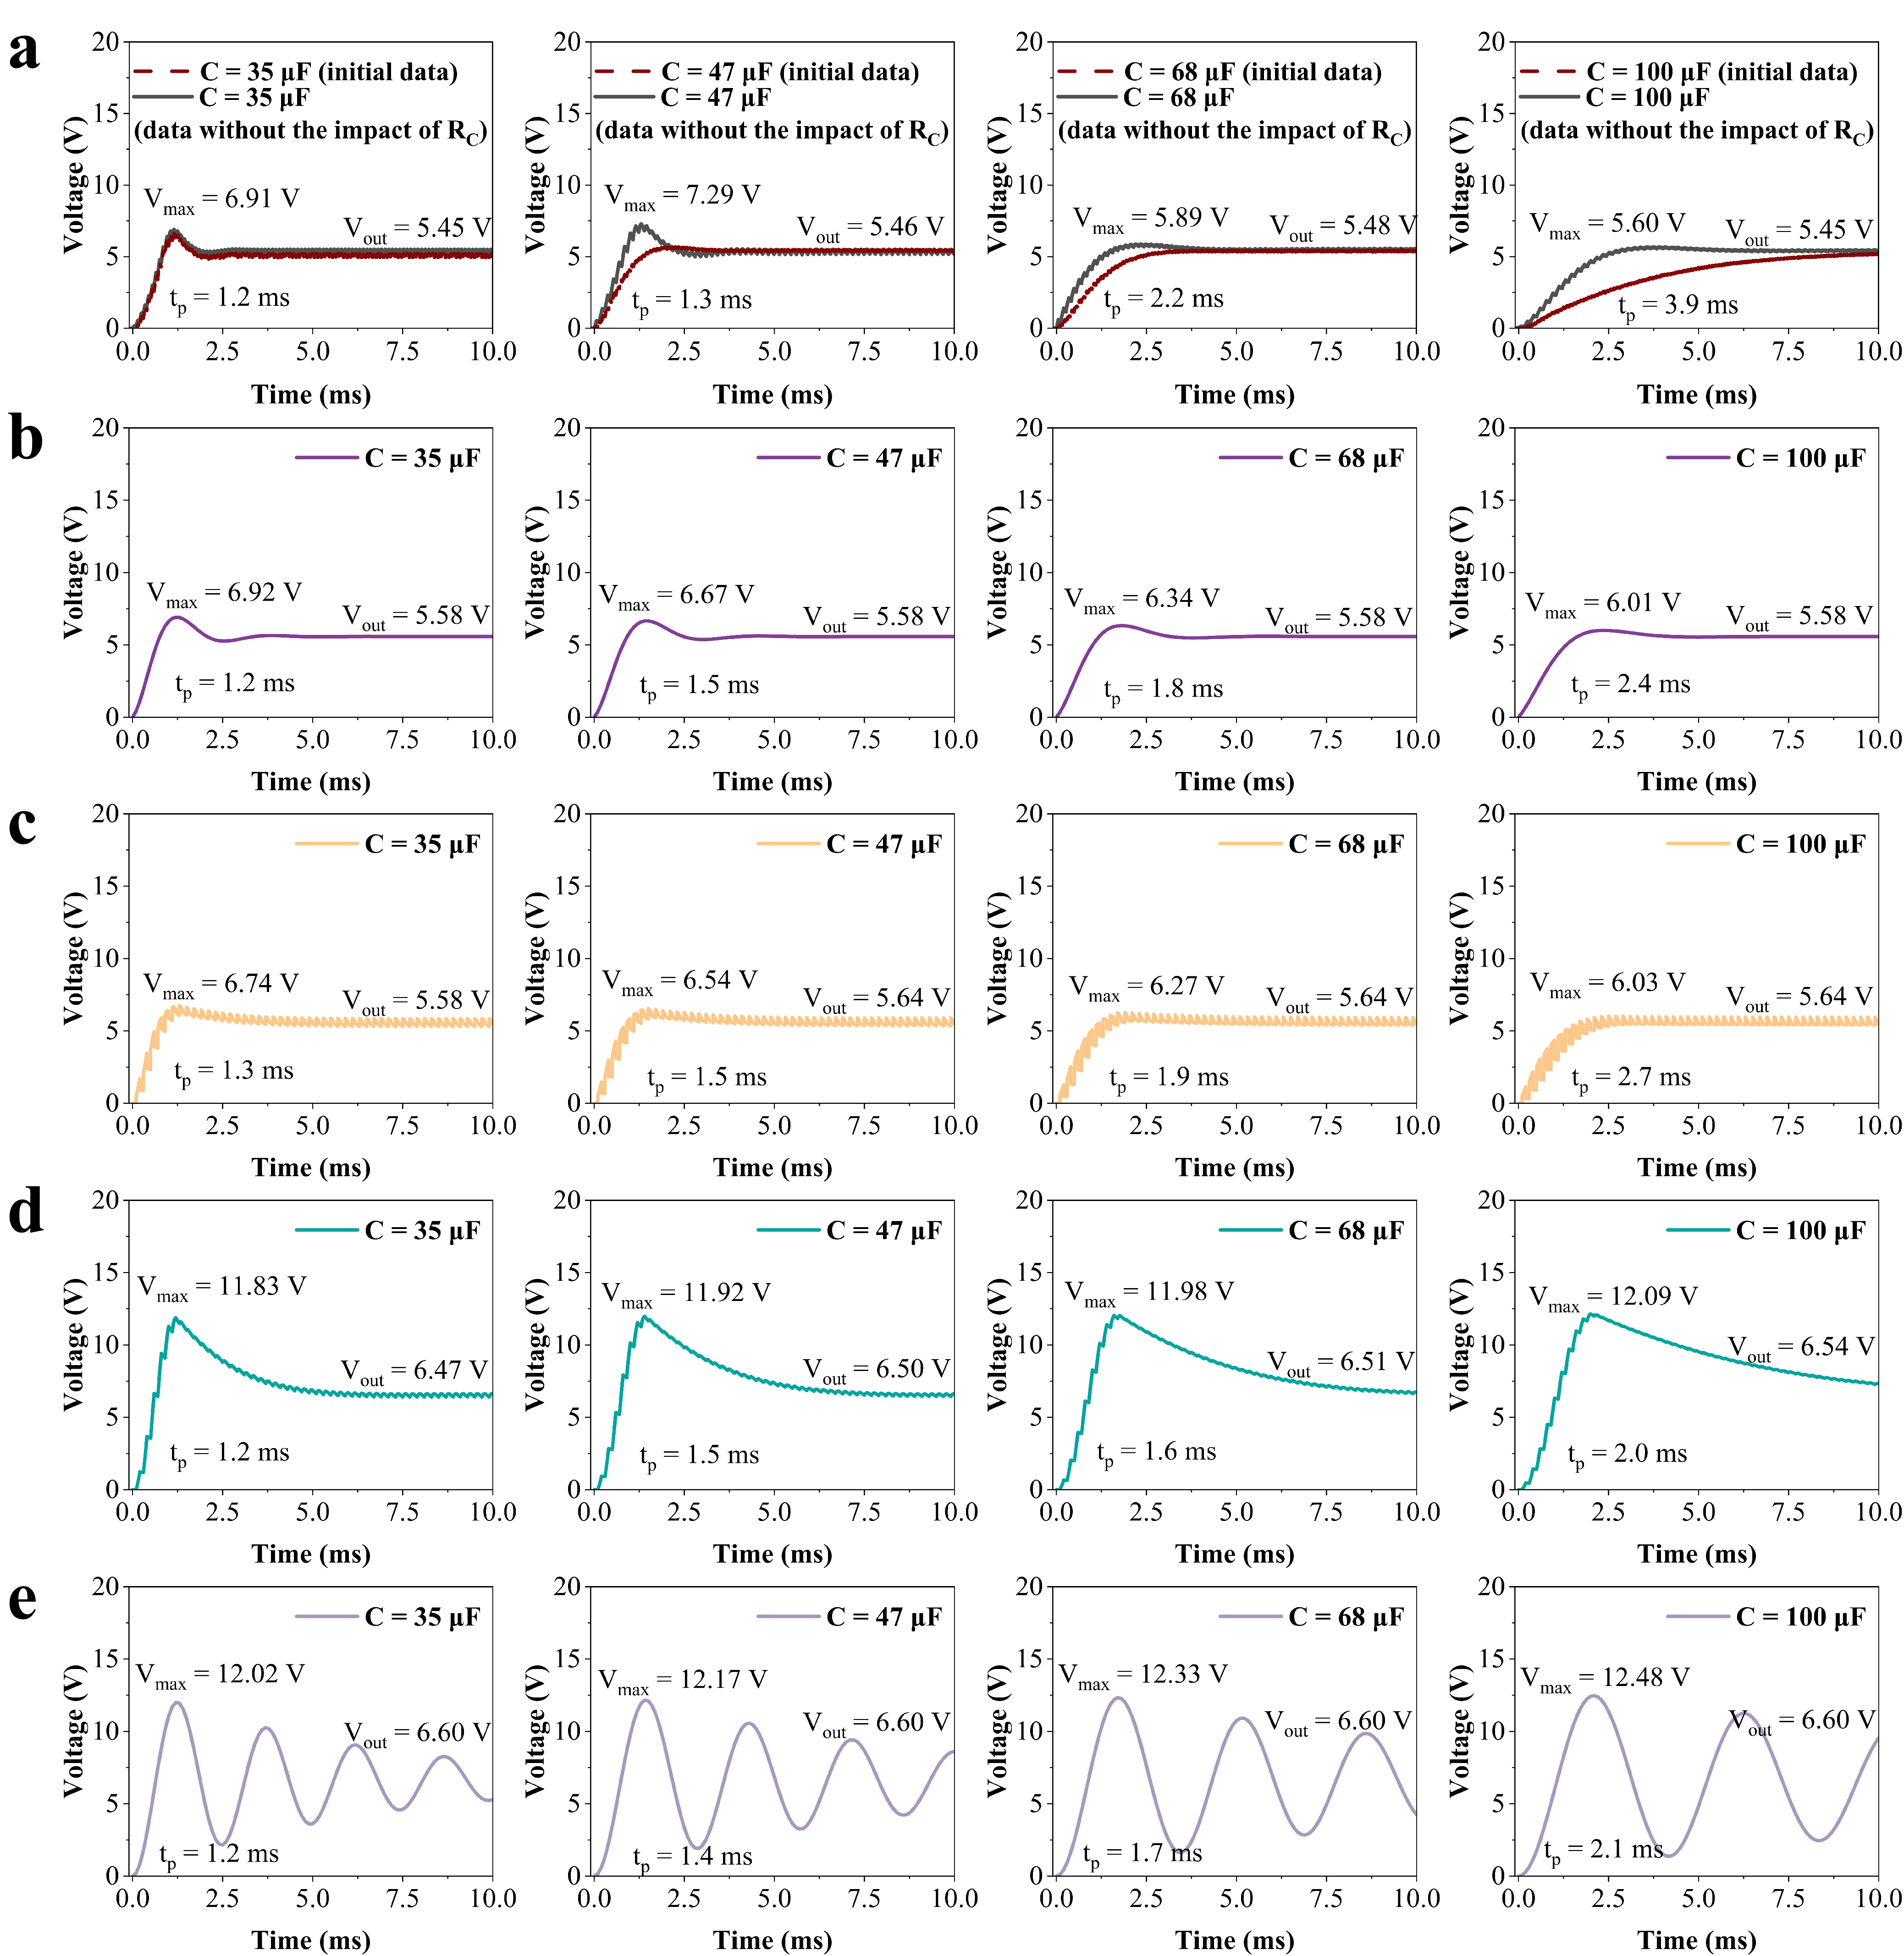


**Fig. S7. Influence of on output voltage.** **a**, AER (The red line represents the initial data, while the black line represents the data after eliminating the influence of according to the trend shown in Fig. S11). **b**, ECMF-TFM. The fitting results are in good agreement with the experimental data. **c**, SWP. While the steady-state performance is satisfactory, there is a partial loss in dynamic performance. **d**, SWOP. Both the steady-state and dynamic performances exhibit significant deviations from the experimental results. **e**, FR. The oscillation time is excessively long, resulting in a substantial discrepancy with the experimental results.


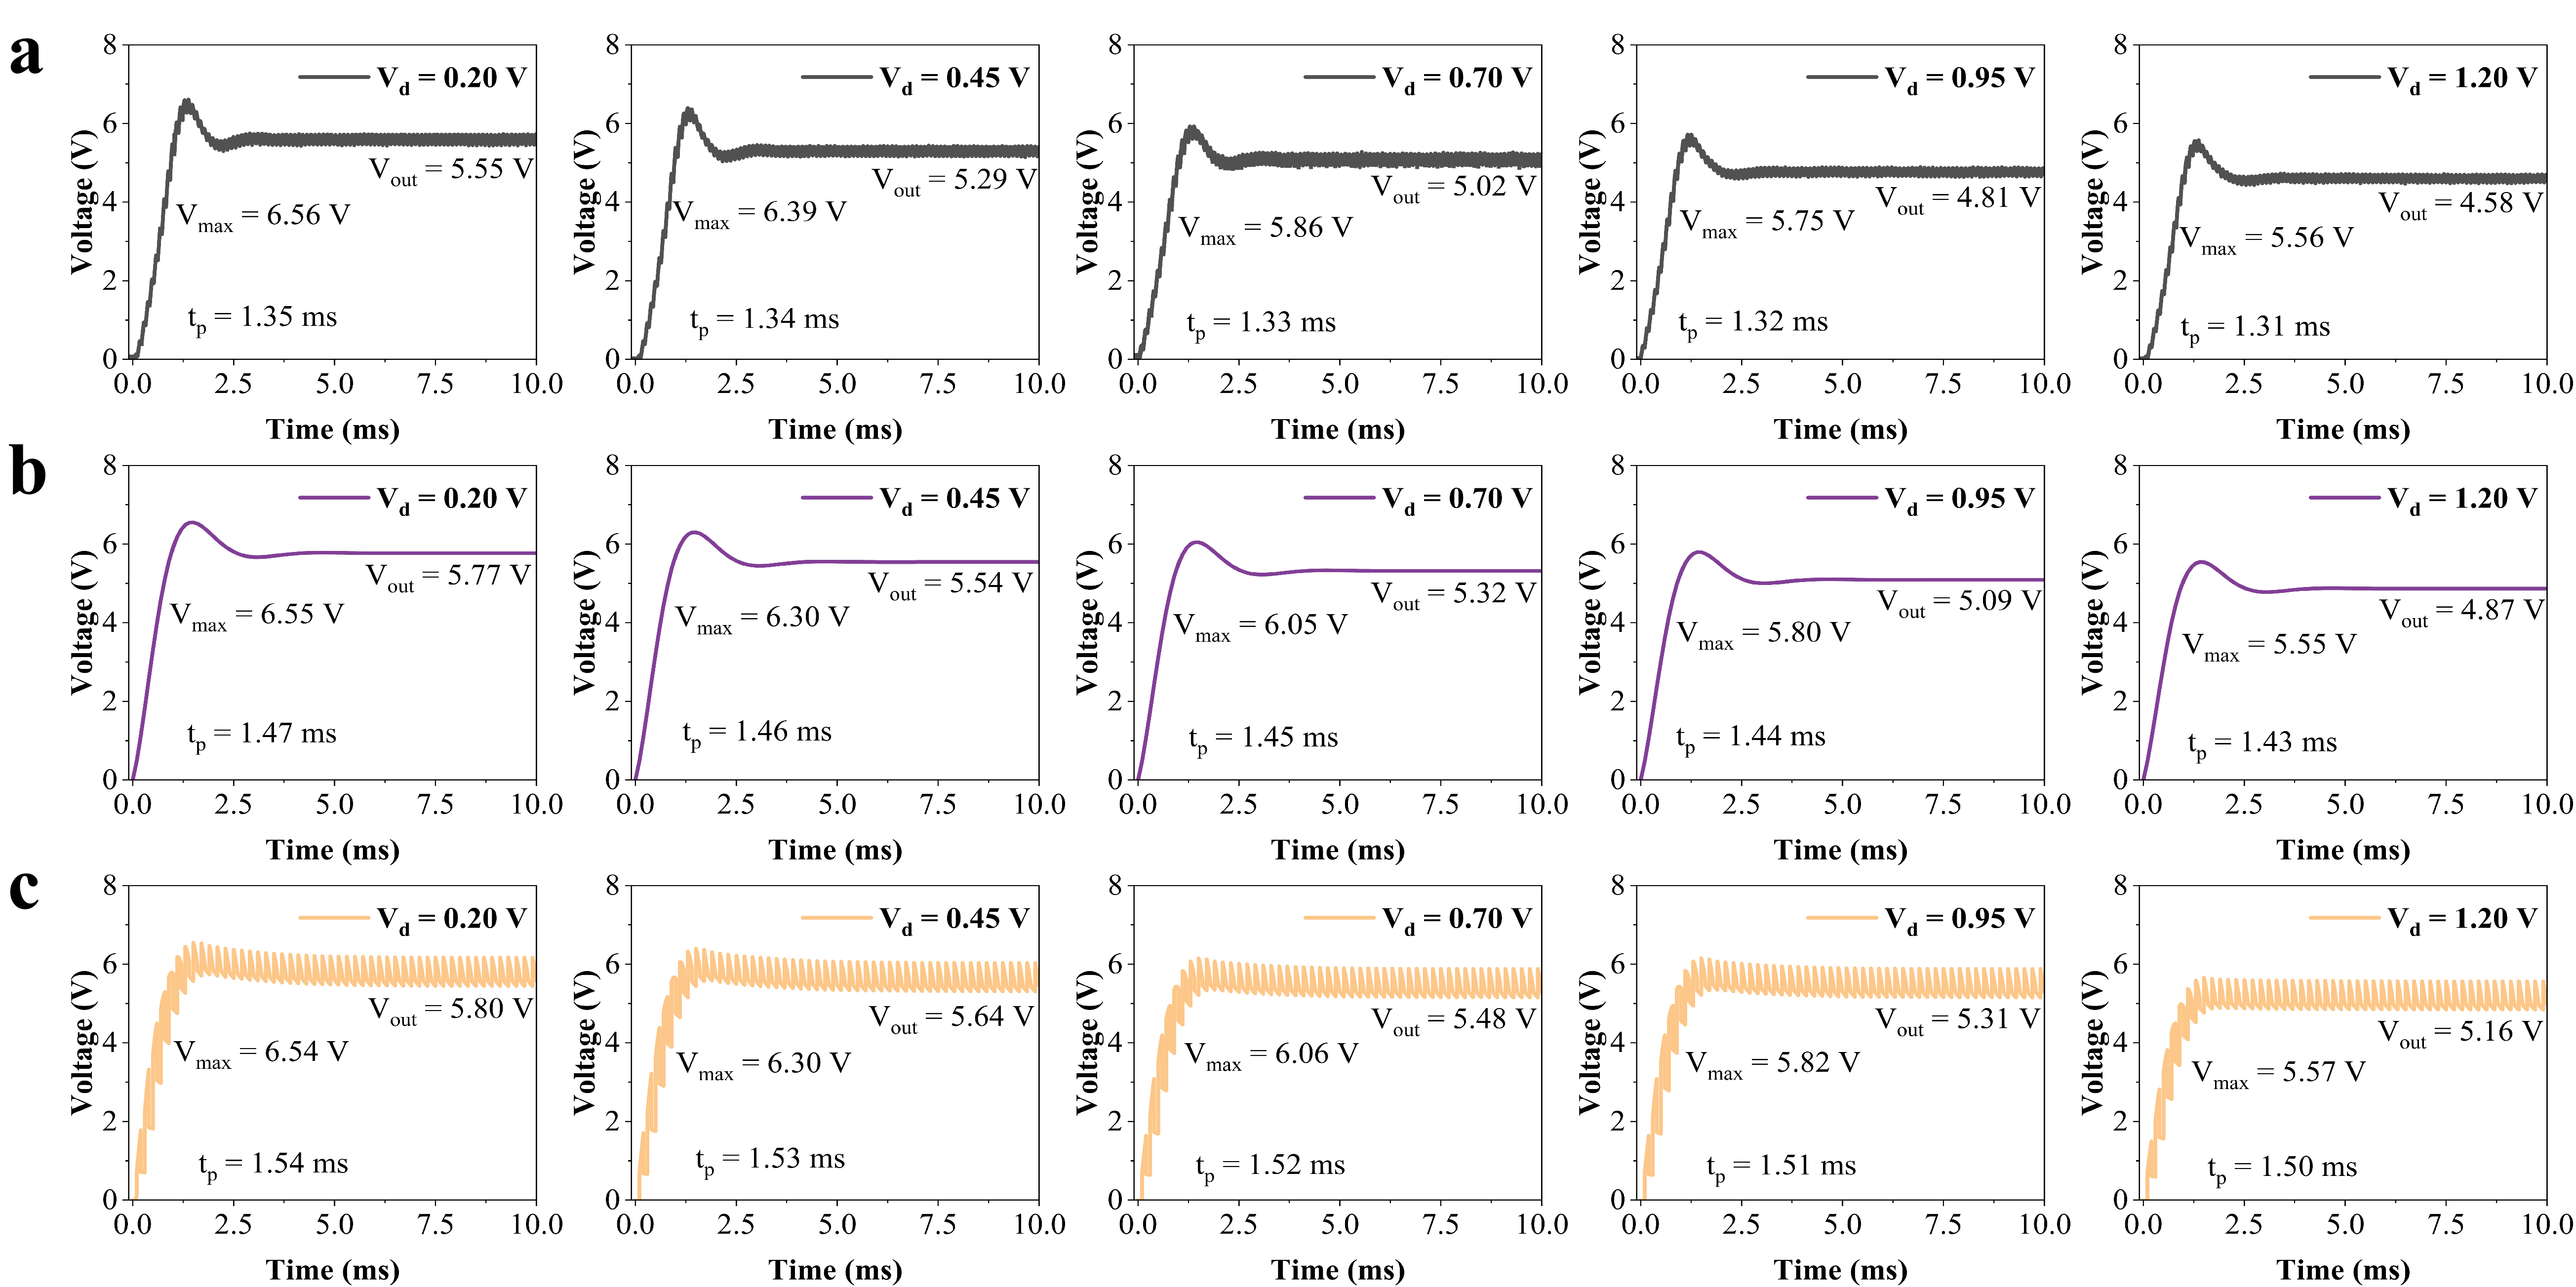


**Fig. S8. Influence of on output voltage.** **a**, AER. **b**, ECMF-TFM. The fitting results are in good agreement with the experimental data. **c**, SWP. While the steady-state performance is satisfactory, there is a partial loss in dynamic performance.


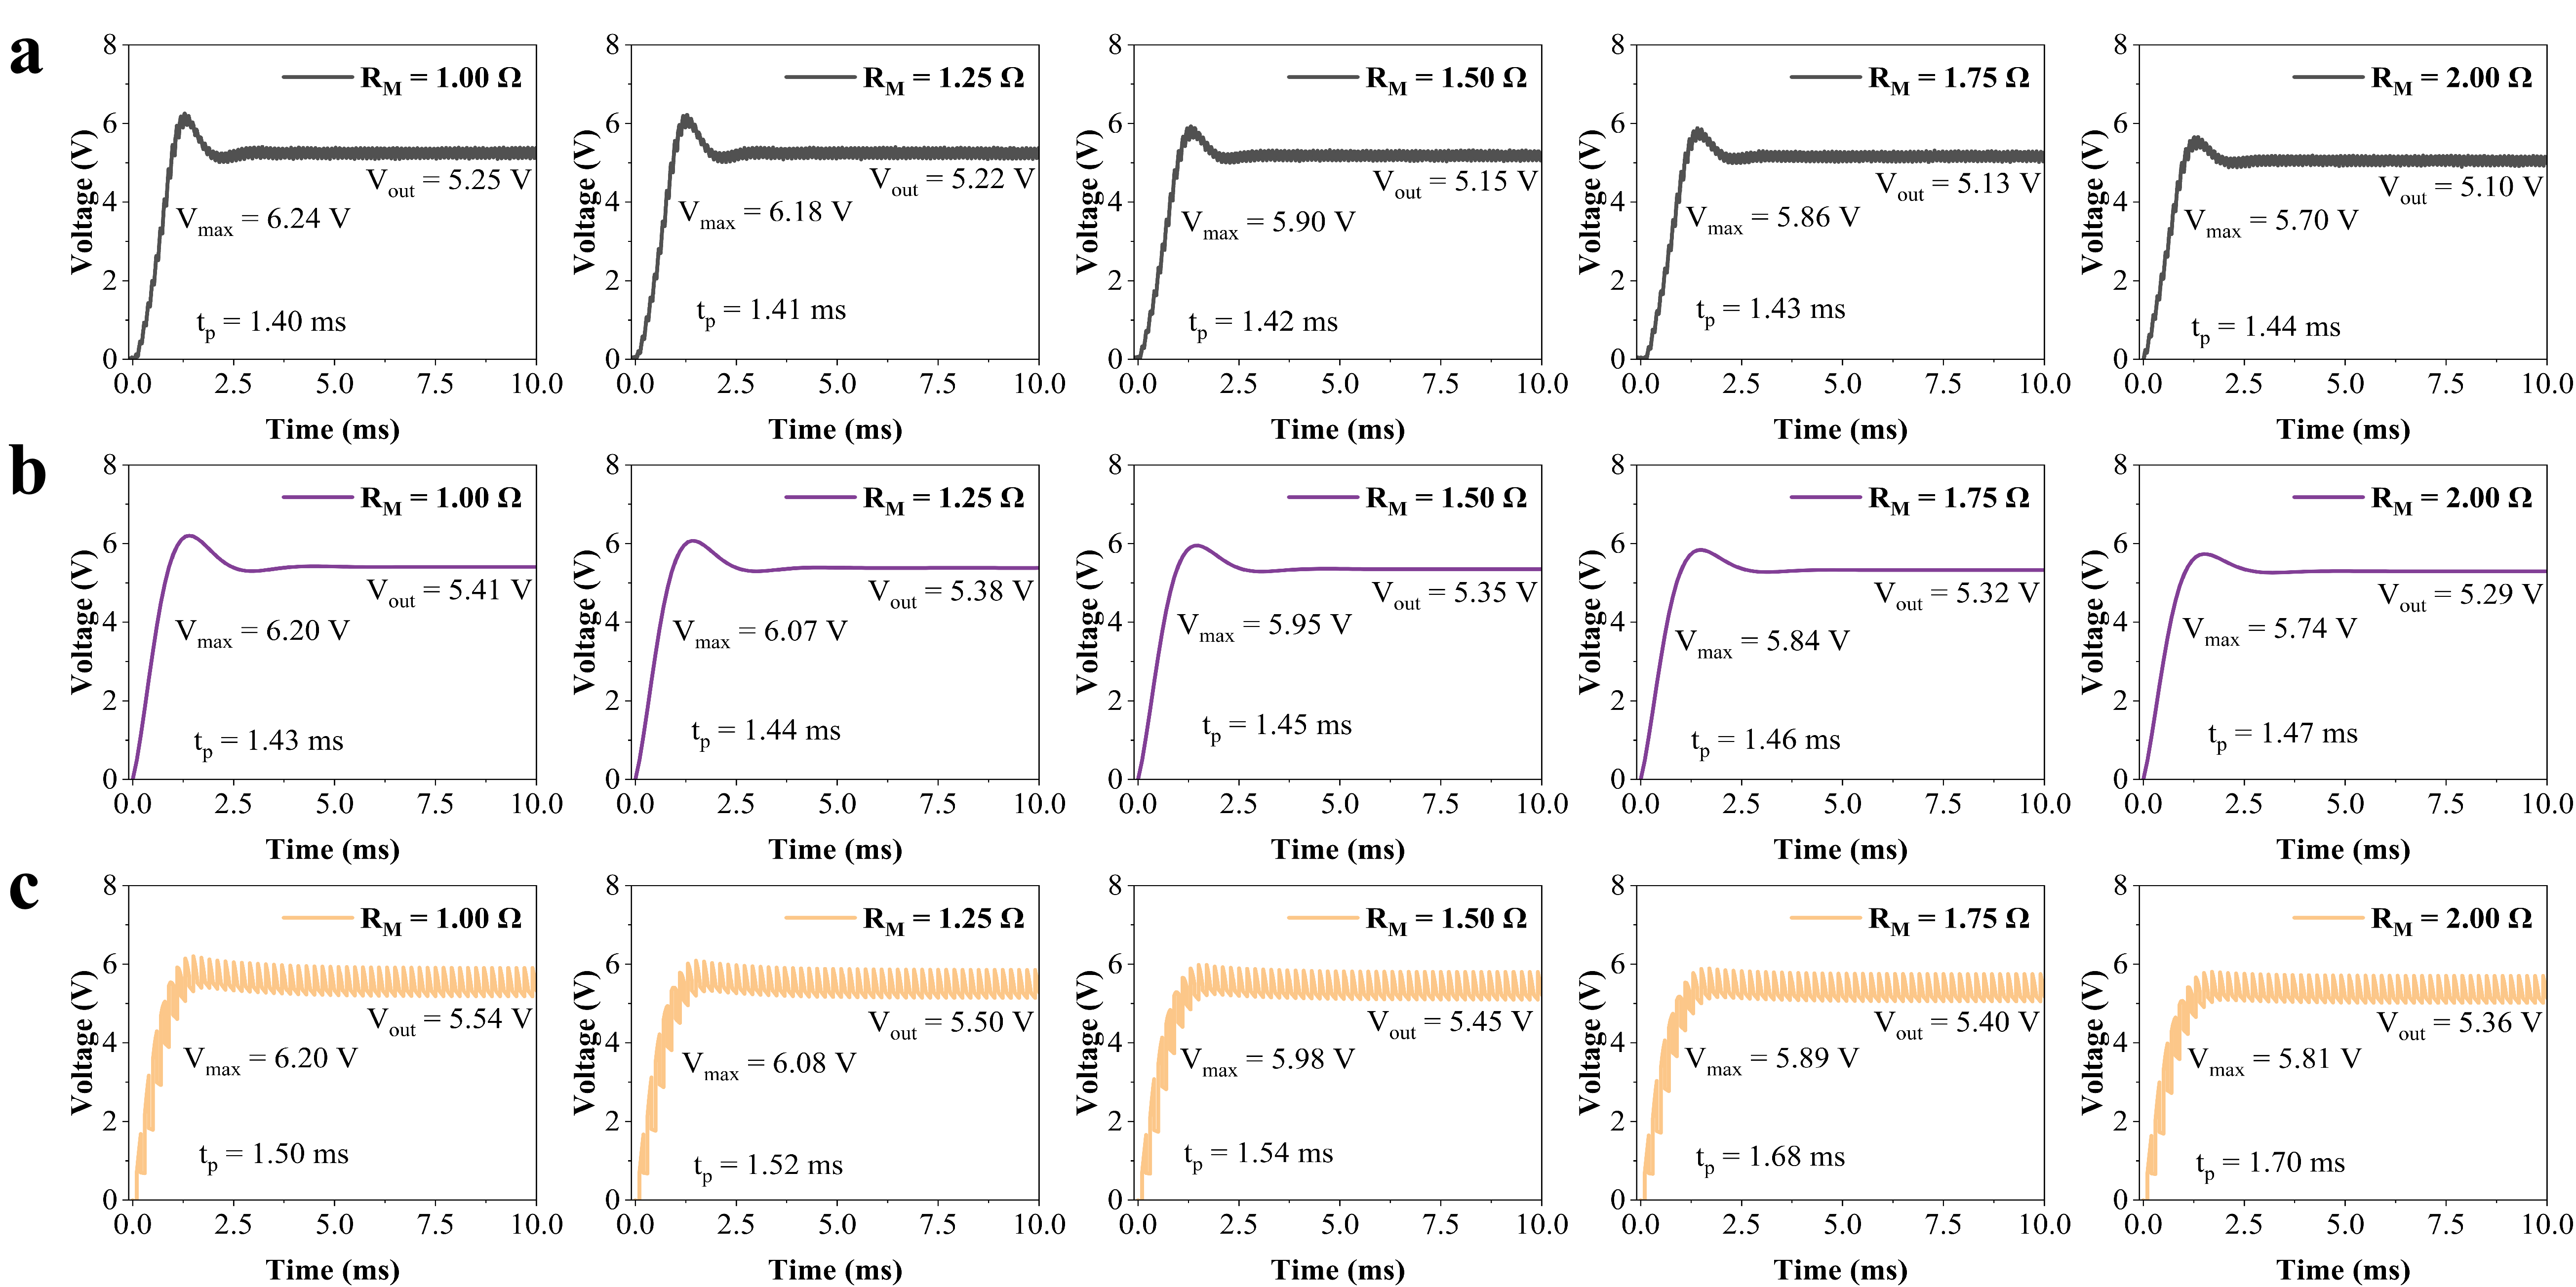


**Fig. S9. Influence of on output voltage.** **a**, AER. **b**, ECMF-TFM. The fitting results are in good agreement with the experimental data. **c**, SWP. While the steady-state performance is satisfactory, there is a partial loss in dynamic performance.


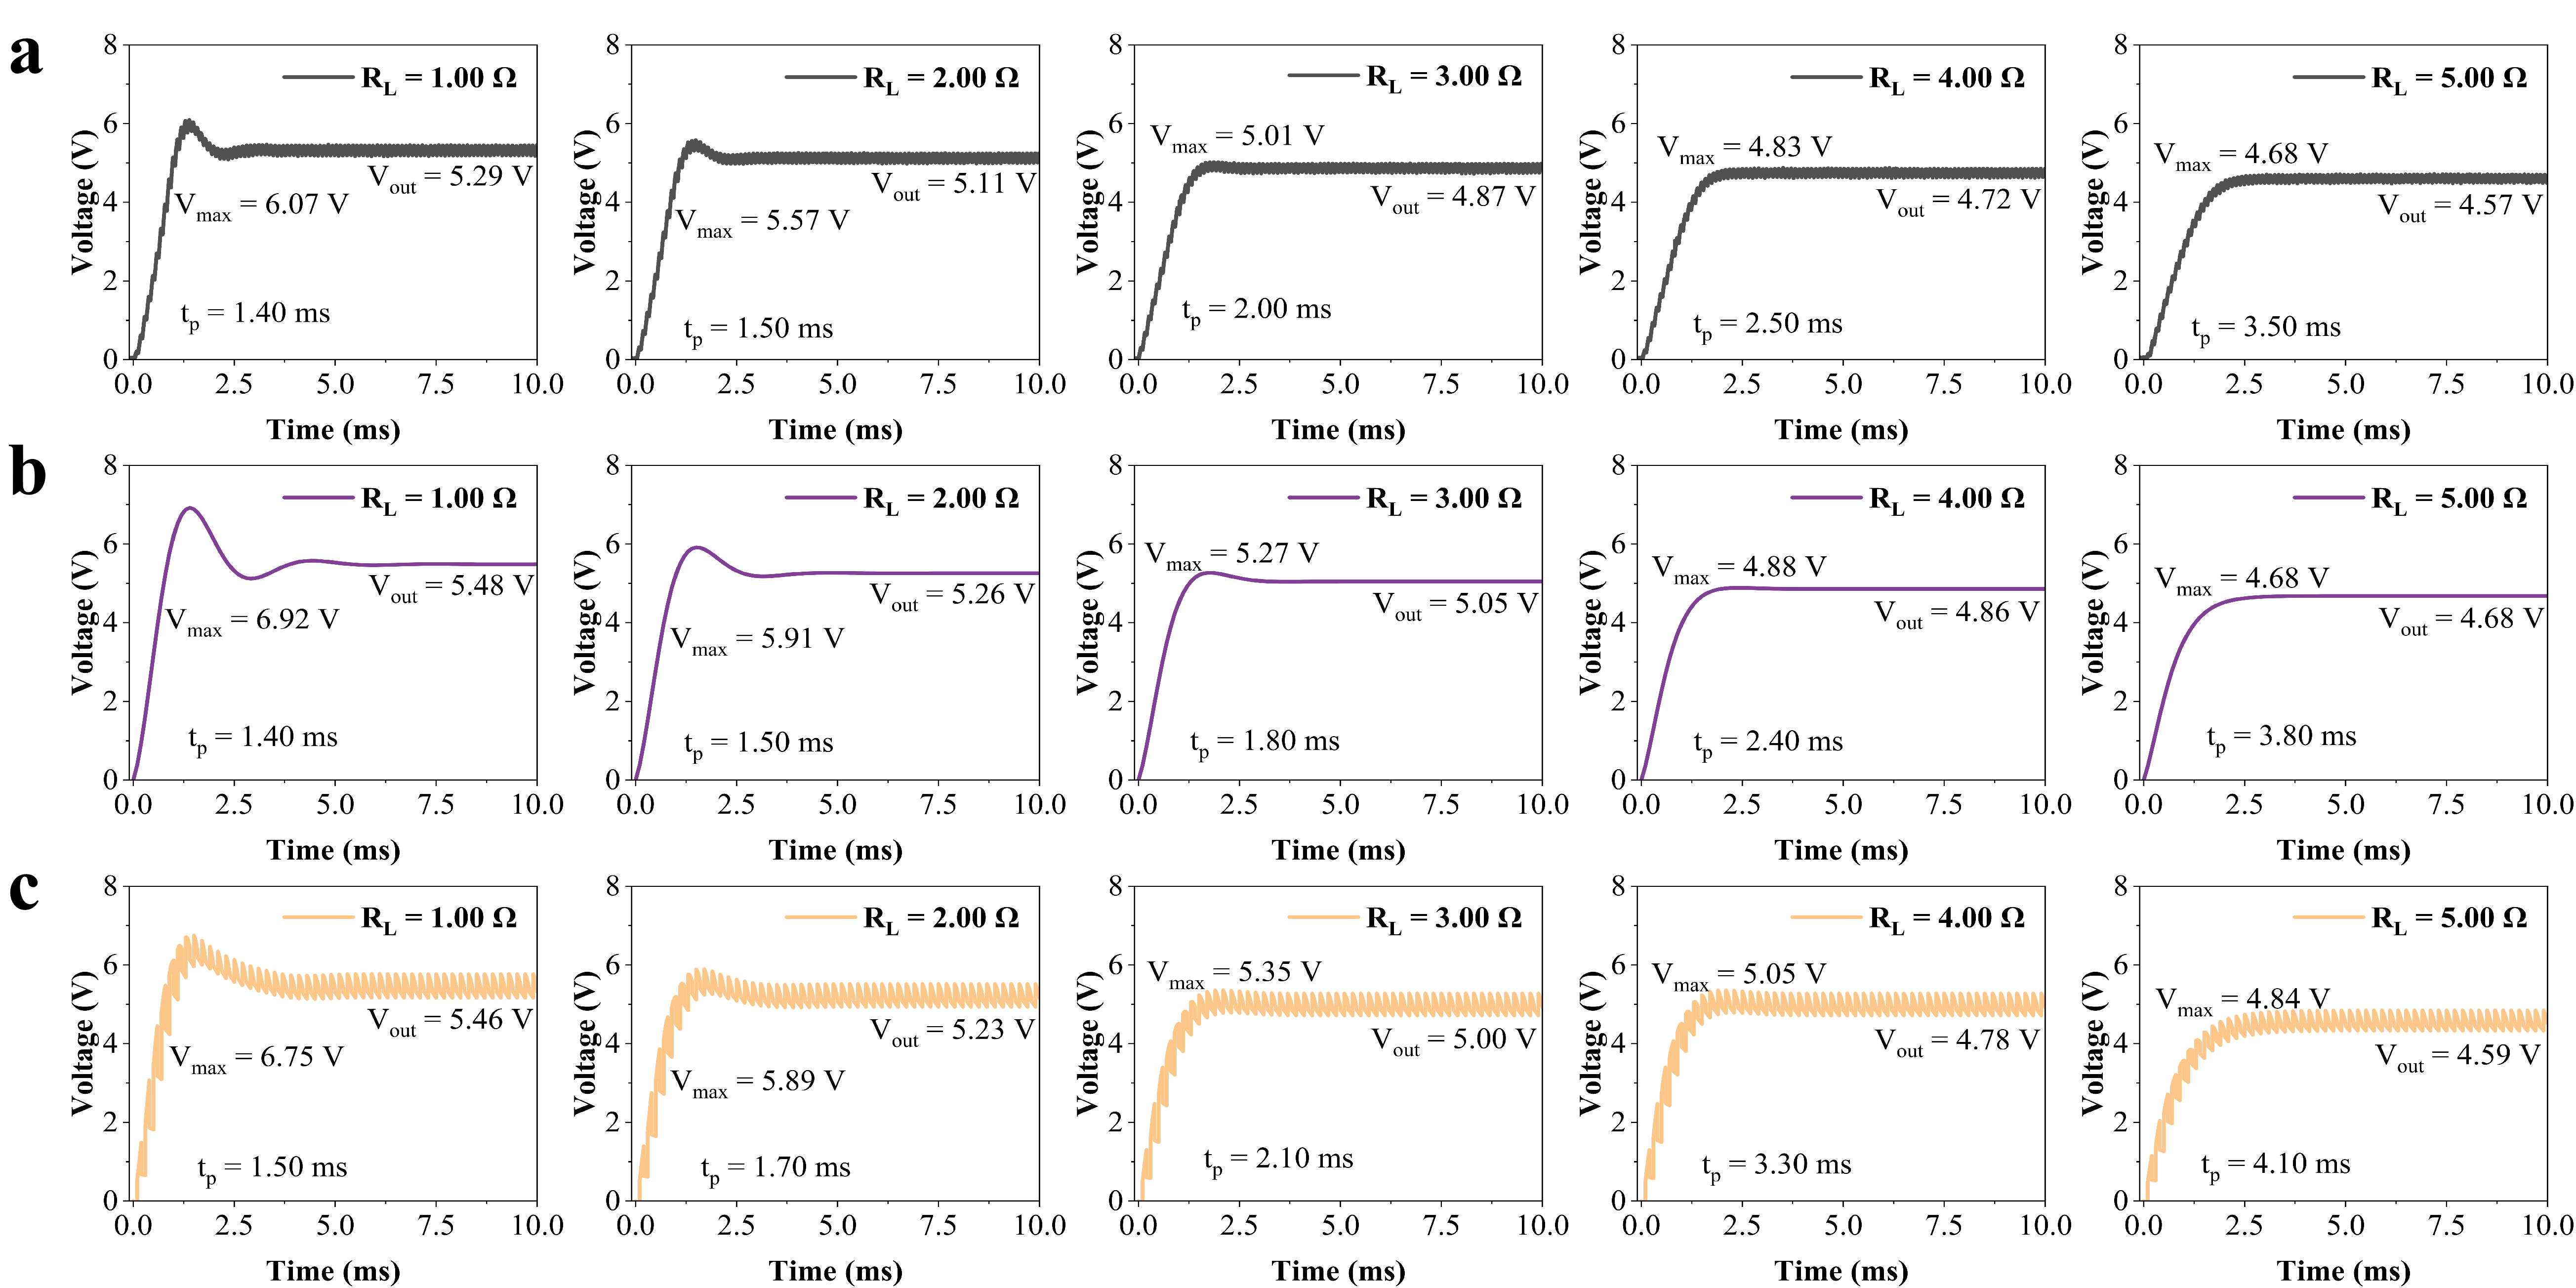


**Fig. S10. Influence of on output voltage.** **a**, AER. **b**, ECMF-TFM. The fitting results are in good agreement with the experimental data. **c**, SWP. While the steady-state performance is satisfactory, there is a partial loss in dynamic performance.


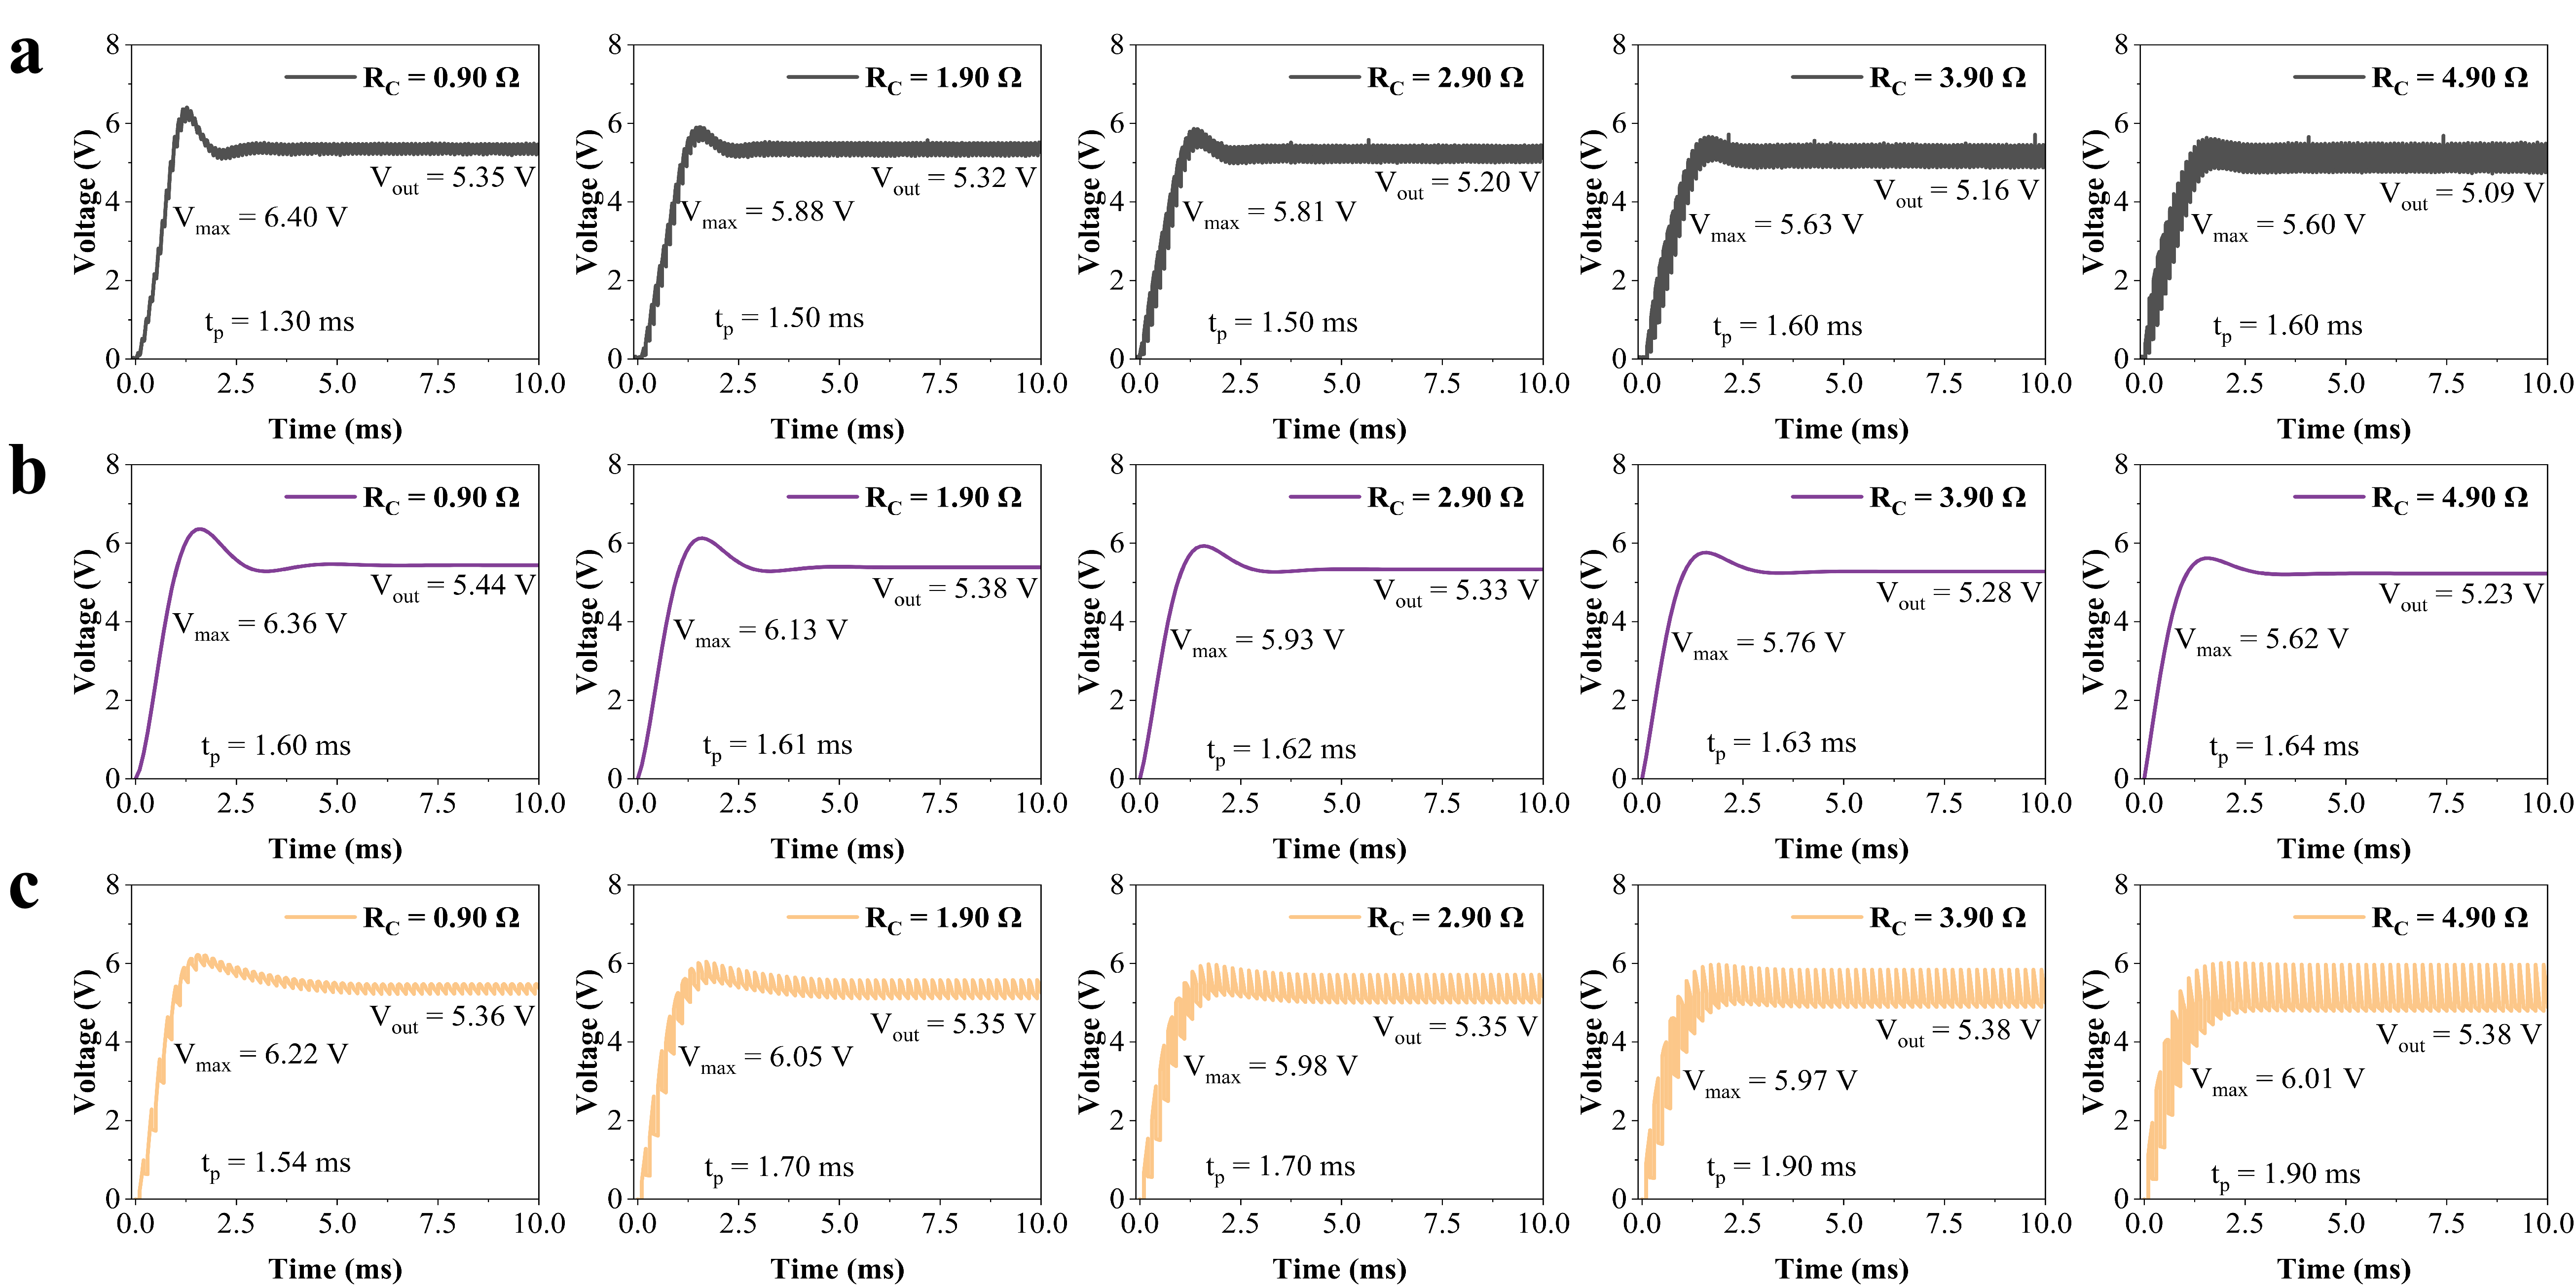


**Fig. S11. Influence of on output voltage.** **a**, AER. **b**, ECMF-TFM. The fitting results are in good agreement with the experimental data. **c**, SWP. While the steady-state performance is satisfactory, there is a partial loss in dynamic performance.


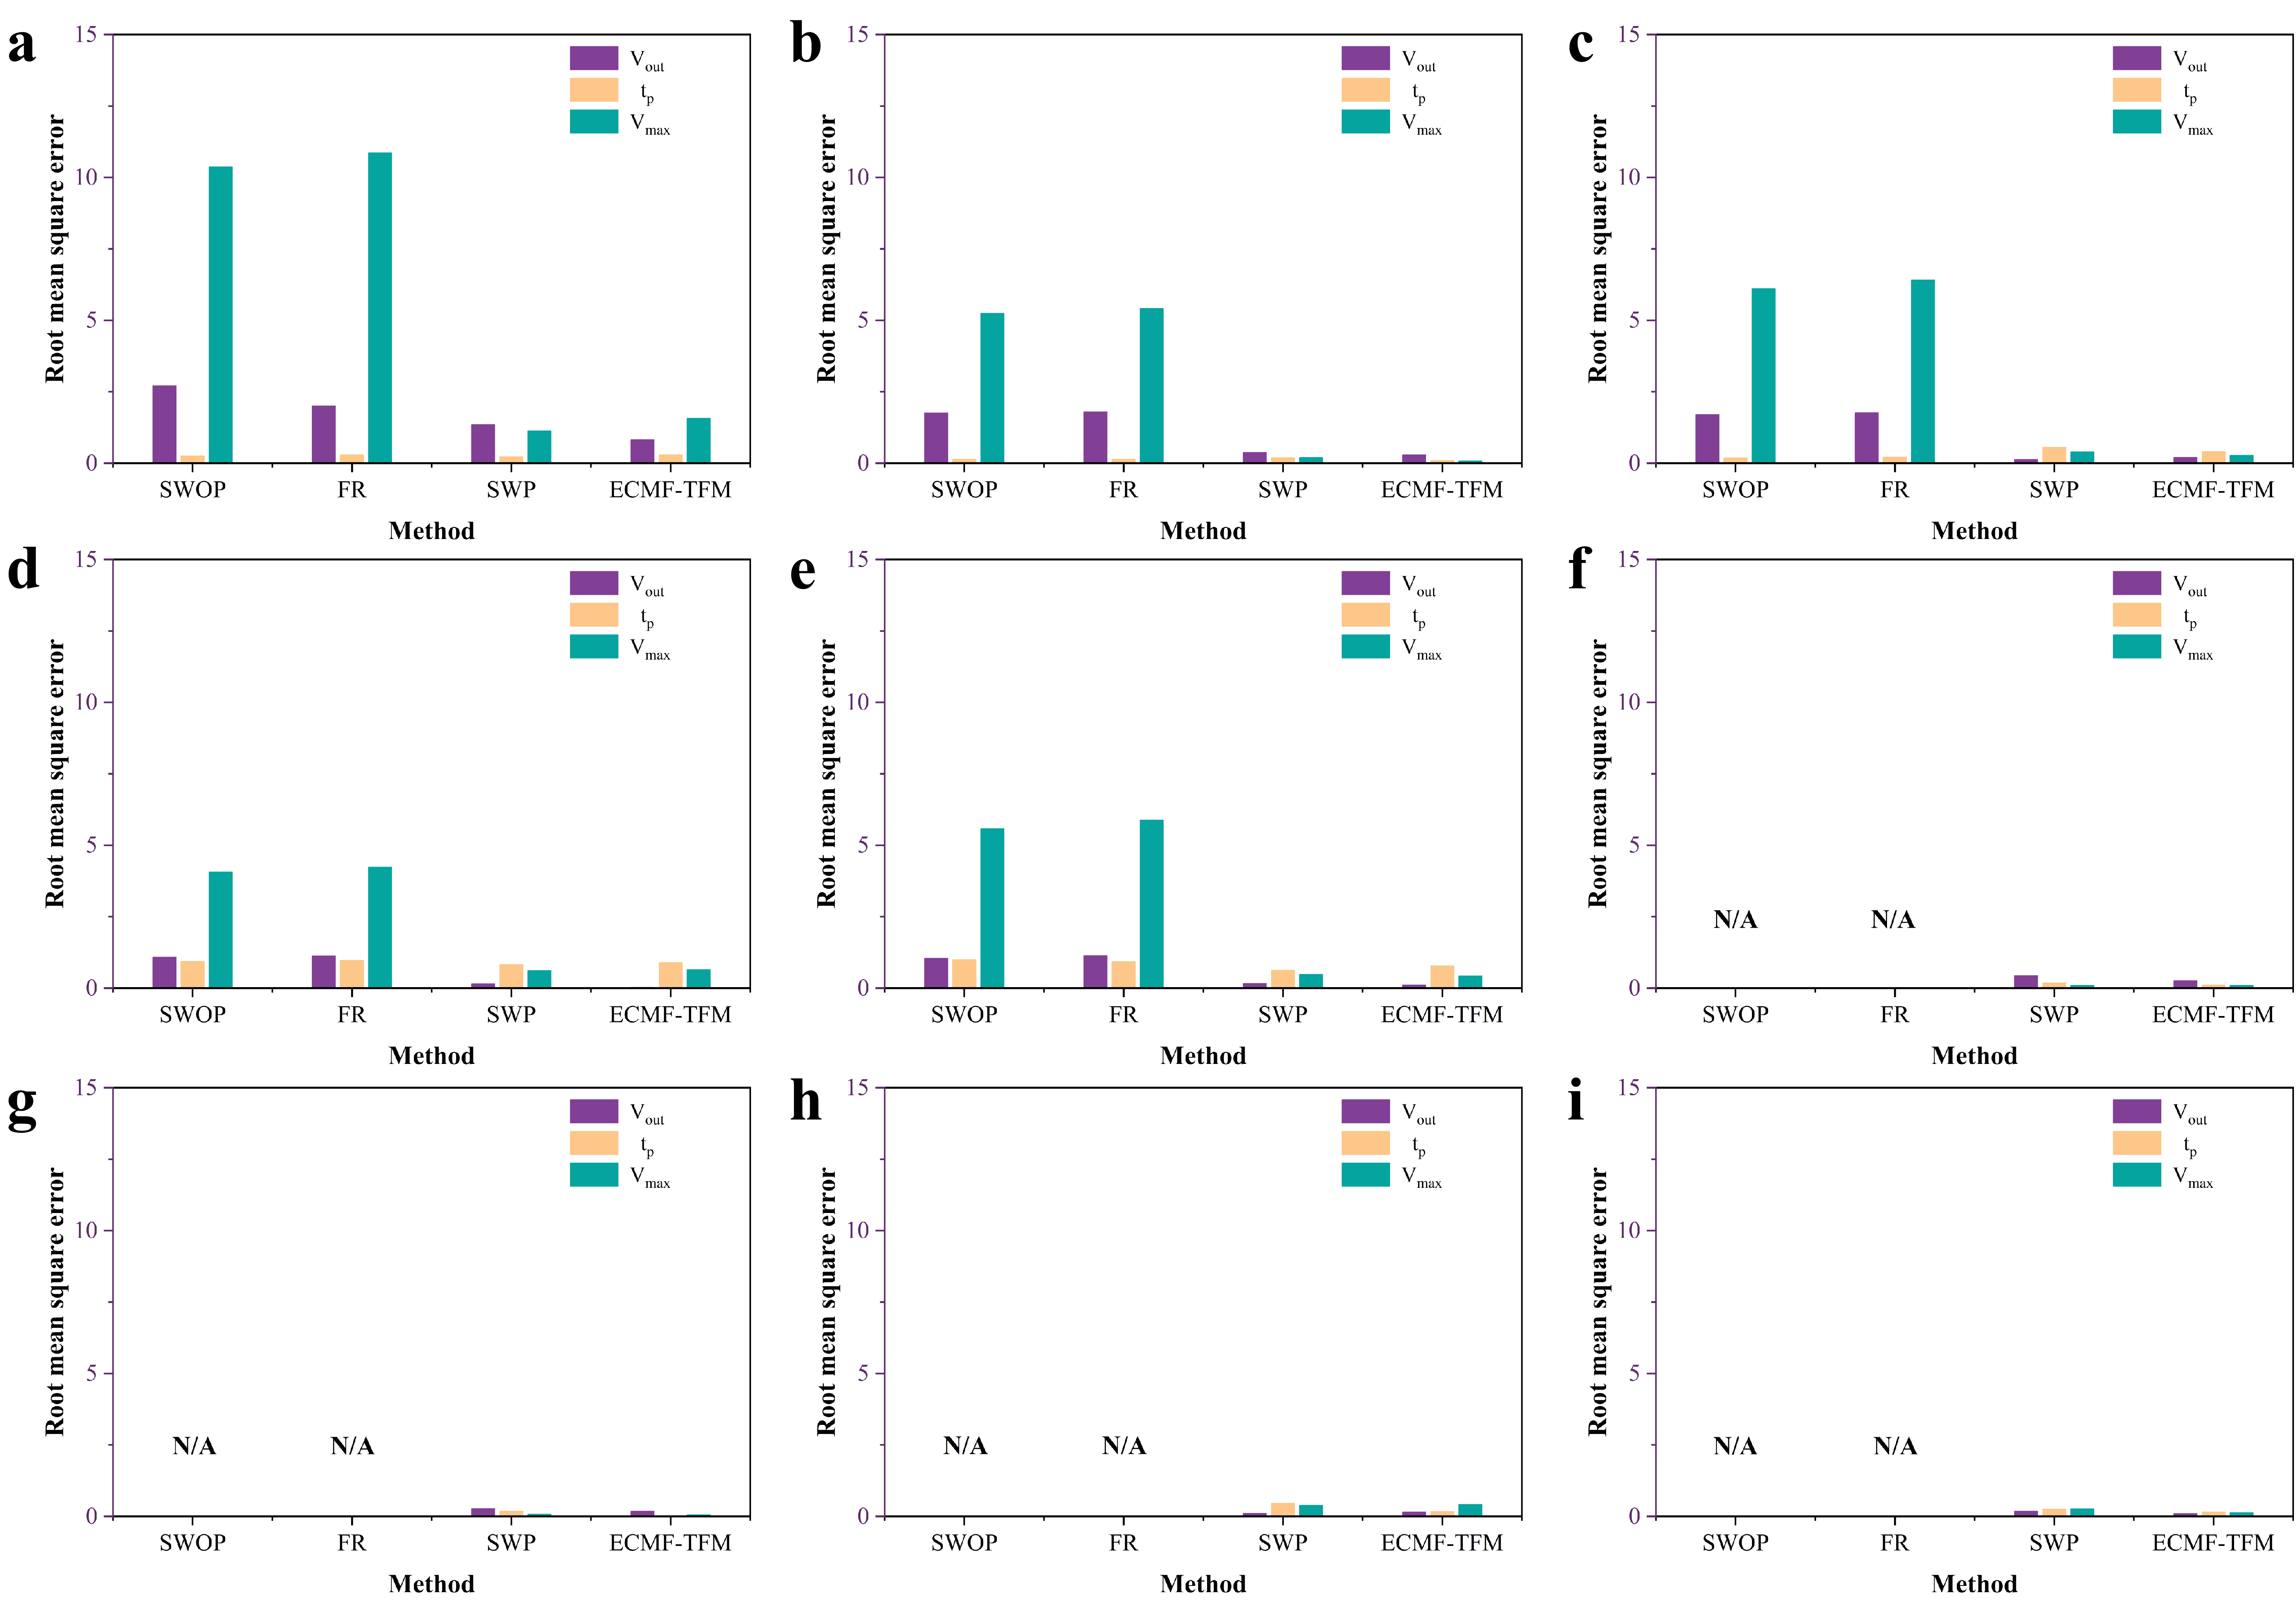


**Fig. S12. Analysis of fitting errors for different models.** **a-e**, As , , , , and vary, the root mean square errors of and for ECMF-TFM are significantly reduced. **f-i**, As , , , and vary, the root mean square errors of and for ECMF-TFM remain similarly small.


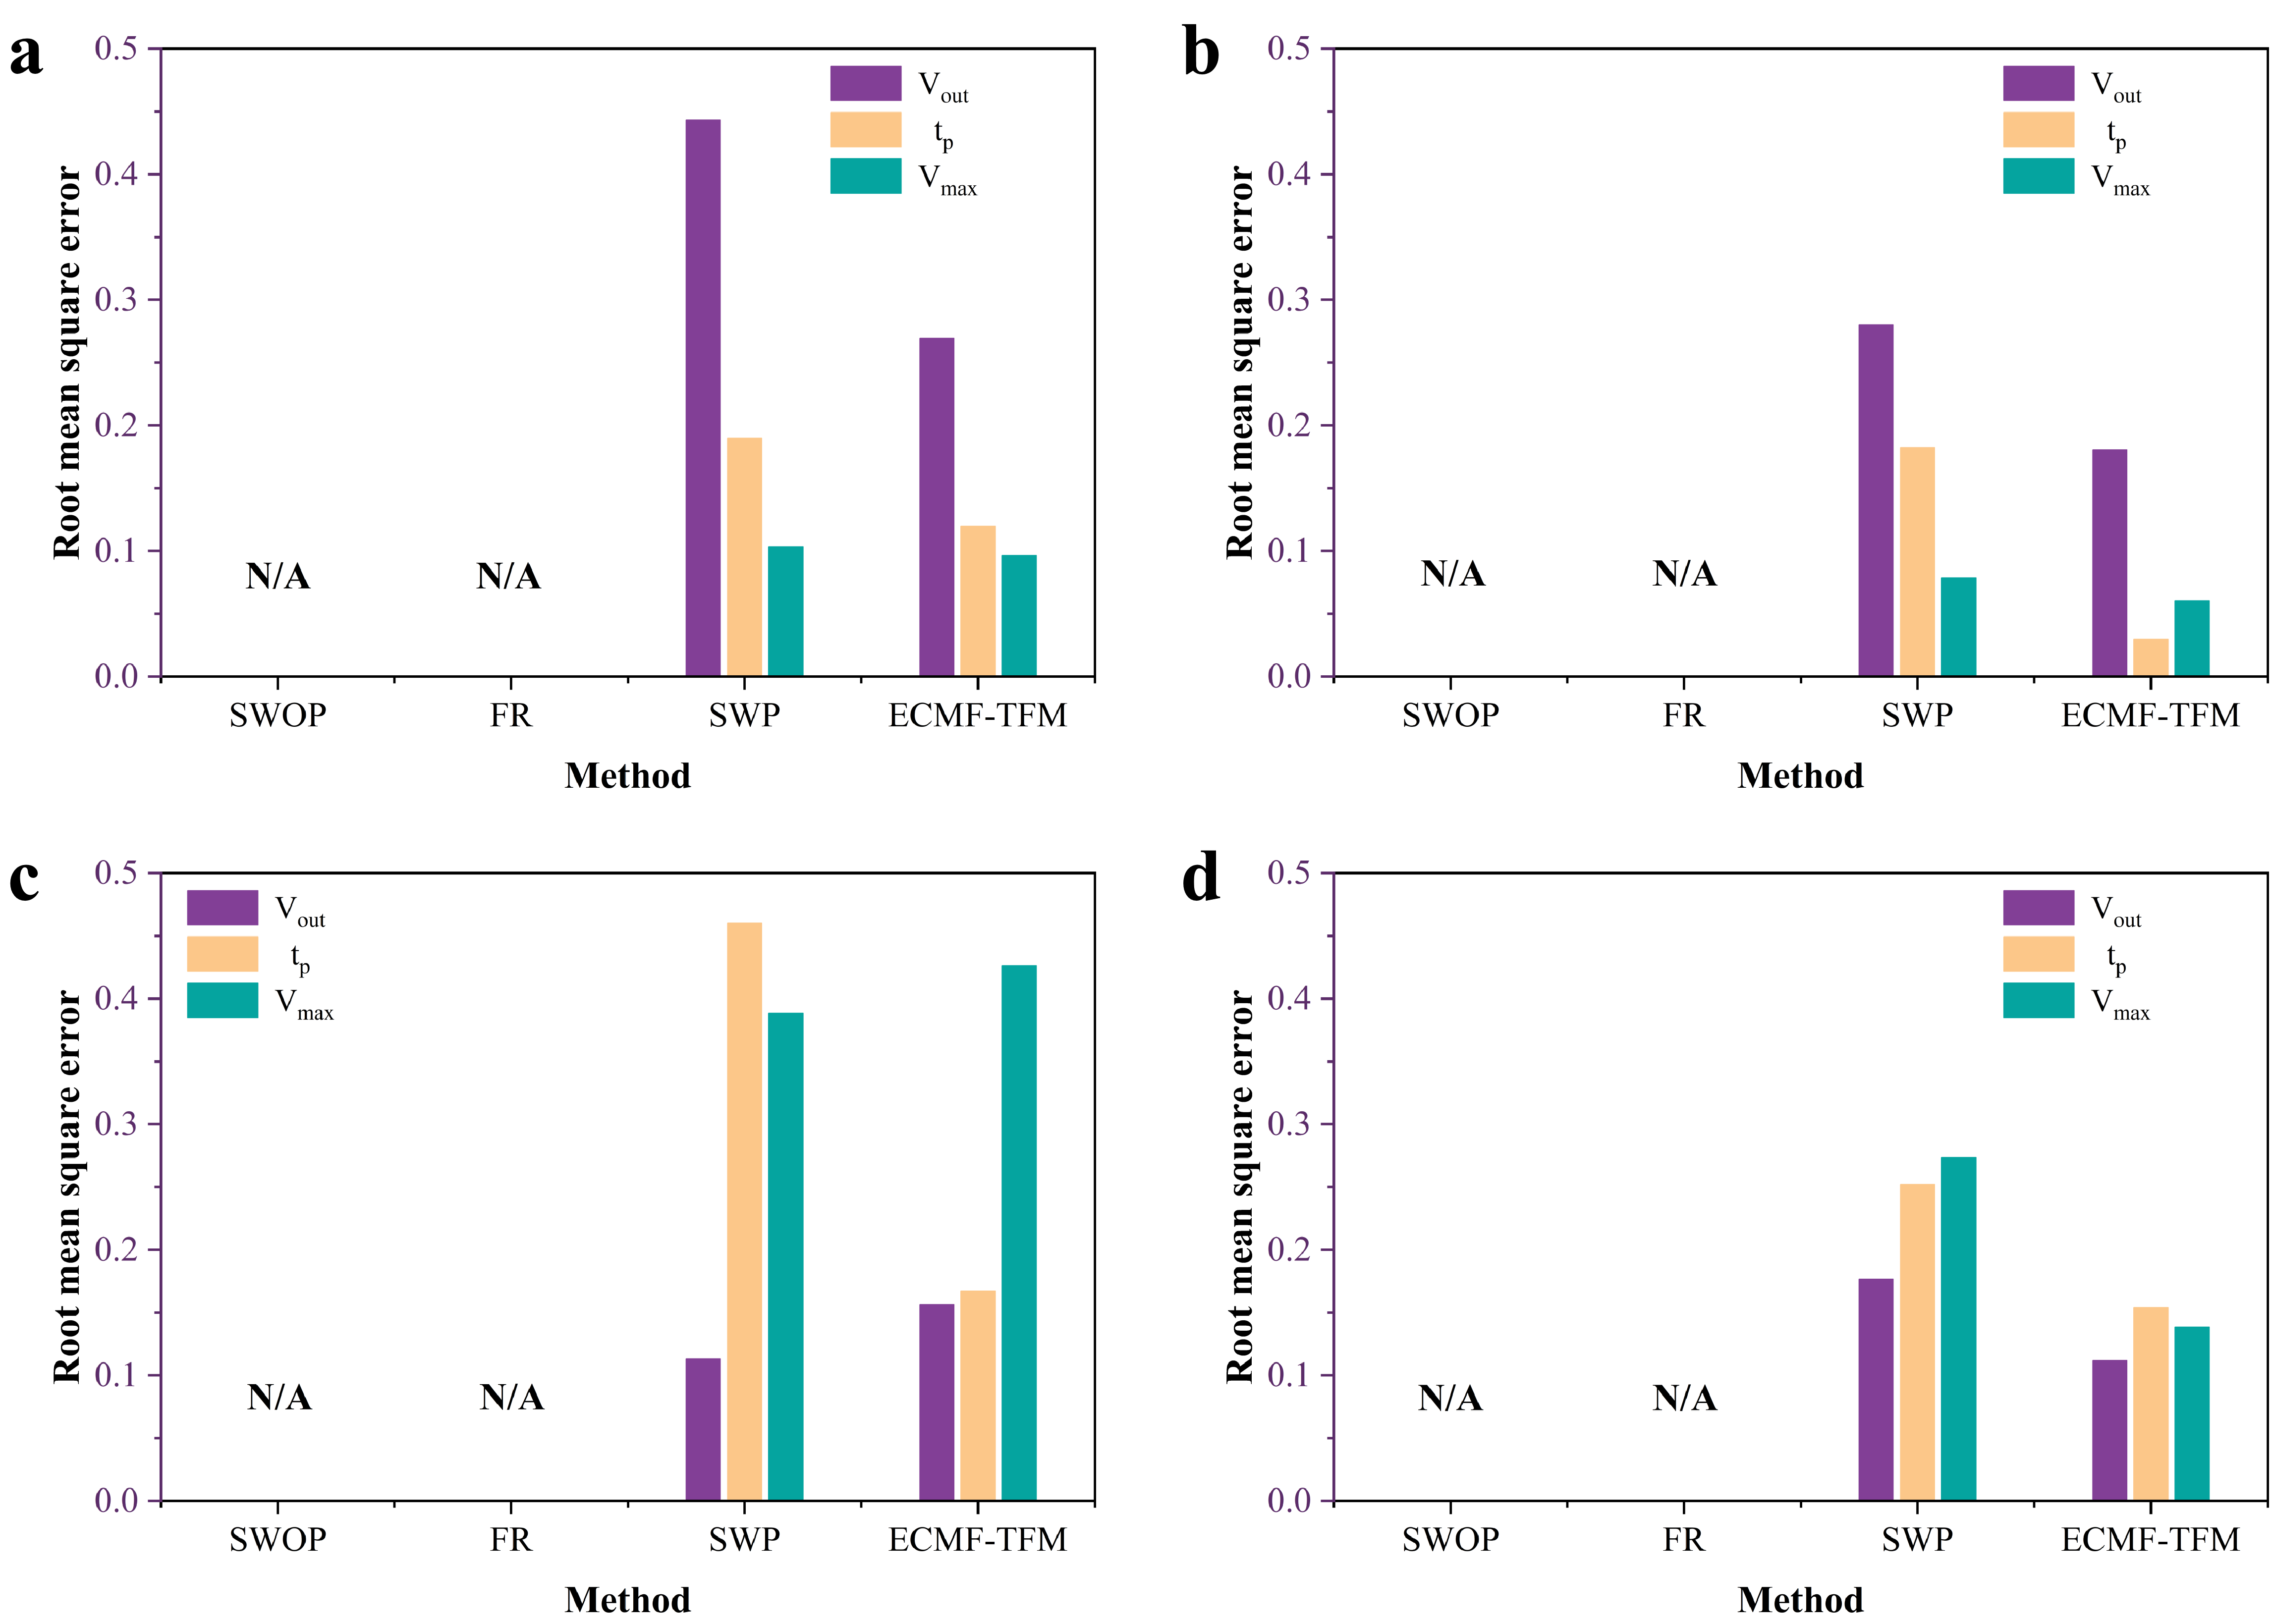


**Fig. S13. Magnified plot of the RMSE.** **a-d**, As , , , and vary, all root mean square errors for ECMF-TFM remain below 0.5.

**Tables**

**Table S1**. Parameter values of different methods (when changes).

|  | Nominal value | Method 1 | Method 2 | Method 3 |
| --- | --- | --- | --- | --- |
|  | 3.3 V | 3.3 V | 3.3 V | 3.3 V |
|  | 1±0.1 mH | 1 mH | 1 mH | 20 mH |
|  | 1.4±0.1 Ω | 1.5 Ω | 1.4 Ω | 1.4 Ω |
|  | 47±5 μF | 42 μF | 42 μF | 5 μF |
|  | 1.2±0.1 Ω | 1.3 Ω | 1 Ω | 1 Ω |
|  | 0.8±0.1 Ω | 0.9 Ω | 0.8 Ω | 0.8 Ω |
|  | 0.4±0.1 V | 0.5 V | 0.4 V | 0.4 V |
|  | 95±5 Ω | 92 Ω | 95 Ω | 95 Ω |
|  | 0.50±0.02 | 0.49 | 0.50 | 0.40 |

**Table S2**. Error analysis of different models (when changes).

|  | (V) | Steady-state error (%) | (V) | Dynamic-state error (%) |
| --- | --- | --- | --- | --- |
| AER | 5.35 | - | 6.74 | - |
|  | 6.47 | 20.9 | - | - |
| FR | 6.47 | 20.9 | 11.94 | 77.1 |
| ECMF | 5.45 | 1.9 | 6.71 | 0.4 |
| ECMF-TFM | 5.45 | 1.9 | 6.40 | 5.0 |

**Table S3**. Parameter values of different methods (when changes).

|  | Nominal value | Method 1 | Method 2 | Method 3 |
| --- | --- | --- | --- | --- |
|  | 5.0 V | 5.0 V | 5.0 V | 5.0 V |
|  | 1±0.1 mH | 1 mH | 1 mH | 1 mH |
|  | 1.4±0.1 Ω | 1.4 Ω | 1.4 Ω | - |
|  | 47±5 μF | 43 μF | 47 μF | 47 μF |
|  | 1.1±0.1 Ω | 1.0 Ω | 1.2 Ω | - |
|  | 0.8±0.1 Ω | 0.8 Ω | 0.8 Ω | - |
|  | 0.4±0.1 V | 0.4 V | 0.4 V | - |
|  | 10±2 Ω | 10 Ω | 8.5 Ω | 8.5 Ω |
|  | 140±4 Ω | 140 | 141.5 | 141.5 |
|  | 0.50±0.02 | 0.50 | 0.50 | 0.50 |

**Table S4**. Error analysis of different models (when changes).

|  | (V) | Steady-state error (%) | (V) | Dynamic-state error (%) |
| --- | --- | --- | --- | --- |
| AER | 8.80 | - | 13.43 | - |
| SWOP | 10.15 | 15.3 | 19.09 | 42.1 |
| ECMF | 9.10 | 3.4 | 12.56 | 6.5 |
| ECMF-TFM | 8.67 | 1.5 | 13.27 | 1.2 |

**Table S5**. RMSE for different parameter changes.

|  | RMSE of | | | | RMSE of | | | |
| --- | --- | --- | --- | --- | --- | --- | --- | --- |
|  | SWOP | FR | SWP | ECMF-  TFM | SWOP | FR | SWP | ECMF-  TFM |
|  | 2.71 | 2.00 | 1.35 | 0.83 | 10.37 | 10.87 | 1.14 | 1.58 |
|  | 1.76 | 1.80 | 0.38 | 0.30 | 5.25 | 5.42 | 0.21 | 0.08 |
|  | 1.71 | 1.78 | 0.14 | 0.21 | 6.11 | 6.41 | 0.40 | 0.28 |
|  | 1.09 | 1.13 | 0.15 | 0.04 | 4.07 | 4.24 | 0.62 | 0.65 |
|  | 1.05 | 1.14 | 0.17 | 0.12 | 5.59 | 5.89 | 0.48 | 0.43 |
|  | - | - | 0.44 | 0.27 | - | - | 0.10 | 0.10 |
|  | - | - | 0.28 | 0.18 | - | - | 0.08 | 0.06 |
|  | - | - | 0.11 | 0.16 | - | - | 0.39 | 0.43 |
|  | - | - | 0.18 | 0.11 | - | - | 0.27 | 0.14 |

**Table S6**. Error analysis of output voltage waveform predictions (ECMF-TFM).

|  | (V) | Steady-state error (%) | (V) | Dynamic-state error (%) |
| --- | --- | --- | --- | --- |
| Initial waveform | 8.80 | 1.5 | 13.43 | 1.2 |
| **Fig. 5b** | 8.87 | 0.8 | 9.36 | 0.1 |
| **Fig. 5c** | 8.85 | 2.8 | 9.08 | 6.3 |
| **Fig. 5d** | 8.11 | 2.7 | 9.10 | 0.2 |
| **Fig. 5e** | 8.79 | 1.7 | 8.84 | 2.4 |
| **Fig. 5f** | 8.74 | 3.4 | 9.66 | 1.4 |
| **Fig. 5g** | 8.60 | 2.3 | 9.17 | 3.7 |
| **Fig. 5h** | 8.34 | 3.2 | 8.40 | 1.7 |
| **Fig. 5i** | 8.40 | 1.4 | 9.04 | 5.1 |
